## 32 **Introduction**

33 The activation of an immunological response is an essential and costly energetic physiological  
34 process that results in the reallocation of resources, causing changes in the mechanisms that  
35 control general somatic maintenance (Ayres, 2020; Ganeshan and Chawla, 2014; Ganeshan et  
36 al., 2019; Jung et al., 2019). A tightly controlled immune activation is critical as its dysregulation  
37 has a major impact on a number of vital biological functions (Bird, 2019; Ganeshan et al., 2019;  
38 Jung et al., 2019; Kuchroo et al., 2012; Libert et al., 2006). In addition, the significant metabolic  
39 challenge posed by immune activation, immunopathology, and immune homeostasis necessitates  
40 an allocation of nutrients and energy that may lead to shortened longevity (Ayres, 2020; Backhed  
41 et al., 2019; Franceschi et al., 2018; Kaiser et al., 2020; Riera and Dillin, 2015; Solana et al.,  
42 2006; Tracey, 2002; Wani et al., 2019; Wu et al., 2019). Hence, the imbalance caused by  
43 immune activation results in a tradeoff between immunity and longevity that is evolutionarily  
44 conserved throughout the animal kingdom.

45 While the aforementioned changes to maintain homeostasis suggest the existence of a  
46 tradeoff between immunity and longevity across metazoans, the specific pathways involved in  
47 those tradeoffs and the underlying mechanisms that control them remain unknown. Several  
48 conserved pathways, including the DAF-2 (homolog of insulin-like growth factor 1, IGF1),  
49 AGE-1 (homolog of phosphatidylinositol 3-kinase, PI3K), DAF-16 (homolog of FOXO  
50 transcription factor), and HFS-1 (homolog of heat shock transcription factor 1, HSF1) pathways,  
51 control both immunity and longevity in the nematode *Caenorhabditis elegans* (Chávez et al.,  
52 2007; Garsin et al., 2003; Hajdu-Cronin et al., 2004; Libina et al., 2003; Mohri-Shiomi and  
53 Garsin, 2008; Morris et al., 1996; Murphy et al., 2003; Singh and Aballay, 2006). However,  
54 whether and how these interconnected immune and longevity pathways are regulated by tradeoff  
55 mechanisms still needs to be determined. The nervous system, which can integrate different cues  
56 in milliseconds and interpret conflicting stimuli, is well-equipped to effectively regulate  
57 tradeoffs.

58 To investigate the role of the nervous system in the control of the immunity-longevity  
59 tradeoff, we studied the GABAergic transcription factor PITX/UNC-30 in *C. elegans*.  
60 PITX/UNC-30 transcriptionally regulates the expression of GAD/UNC-25 and SLC32A1/UNC-  
61 47 that are critical in the biosynthesis, packaging, and trafficking of GABA (Cinar et al., 2005;  
62 Eastman et al., 1999b; Garcia et al., 2007; Gendrel et al., 2016; McIntire et al., 1997; McIntire et

63 al., 1993a; McIntire et al., 1993b). We found that UNC-30 loss-of-function mutations led to  
64 enhanced resistance to killing by Gram-negative and Gram-positive bacterial pathogens.  
65 Conversely, UNC-30 loss-of-function mutations resulted in reduced longevity. The resistance to  
66 pathogen infection was mediated by the GATA transcription factor ELT-2 and the p38 mitogen-  
67 activated protein kinase PMK-1. The reduced longevity phenotype of UNC-30 mutants was due  
68 to higher activity of the MAX dimerization protein MXD/MDL-1 and the C2H2-type zinc finger  
69 transcription factor PQM-1. We further found that neuropeptide signaling mediated by the  
70 NPYR/NPR-1 pathway acts downstream of UNC-30 and the amphid sensory neuron ASG to  
71 control the tradeoff. Our findings highlight a neuronal network that controls the tradeoff between  
72 immunity and longevity. Given the conservation of GABAergic signaling and the longevity and  
73 immune pathways involved in the tradeoff, our findings raise the possibility that a similar  
74 process may occur in higher metazoans, including humans.

75

## 76 **Results**

### 77 **Neuronal UNC-30 controls the immunity-longevity tradeoff**

78 As a first step to understand the role of UNC-30 in the control of the immunity-longevity  
79 tradeoff, we studied the survival of *unc-30* loss-of-function animals infected with the human  
80 opportunistic pathogen *P. aeruginosa* strain PA14. We found that *unc-30(ok613)* mutants  
81 exhibited enhanced survival against *P. aeruginosa*-mediated killing compared to wild-type  
82 animals (Figure 1A). We also found that the *unc-30(ok613)* mutants exhibited less visible  
83 bacterial colonization and significantly reduced colony-forming units compared to wild-type  
84 animals (Figure 1B-C). Different *unc-30* strains also displayed enhanced survival against *P.*  
85 *aeruginosa* compared to wild-type animals (Figure S1A). When exposed to *E. coli*, which is the  
86 food source of *C. elegans* in the laboratory, *unc-30(ok613)* mutants exhibited enhanced survival  
87 compared to wild-type animals (Figure 1D and S1B). Because proliferating live *E. coli* is a cause  
88 of death in *C. elegans* and animals deficient in the immune response are persistently colonized  
89 and killed by the bacterium (Garigan et al., 2002; Otarigho and Aballay, 2020; Sutphin and  
90 Kaeberlein, 2009), we first investigated the survival of *unc-30(ok613)* animals on killed *E. coli*.  
91 Because animals fed heat-killed *E. coli* exhibit bloated intestinal lumens that result in up-  
92 regulation of immune pathways (Singh and Aballay, 2019b), we exposed the animals to lawns of  
93 *E. coli* killed by ultraviolet light (UV) that does not cause any intestinal distension (S2A-J). As

94 shown in Figure 1E, the longevity of *unc-30(ok613)* animals is shorter than that of wild-type  
95 animals when exposed to UV-killed *E. coli*. As ampicillin was added to prevent the growth of  
96 any bacteria that might have escaped the heat treatment, we studied whether the addition of the  
97 antibiotic would impact the lifespan of the animals. As shown in Figure S1B, ampicillin did not  
98 affect the lifespan of *unc-30(ok613)* mutants.

99         UNC-30 is mainly expressed in three sensory neuronal cells (ASG, PVD, and OLL),  
100 three interneurons (PVP, RID, and RIH), and two motor neurons (DD and VD), as well as in the  
101 intestine (Cinar et al., 2005; Eastman et al., 1999b; Jin et al., 1994; Kurup and Jin, 2016; Walton  
102 et al., 2015; Westmoreland et al., 2001). To study whether UNC-30 may act cell autonomously  
103 in the intestine to control immune pathways, we knocked down UNC-30 in the intestine of an  
104 RNAi intestine-specific strain, MGH171. The lack of a significant difference between control  
105 and *unc-30* RNAi animals (Figure 1F) suggests that *unc-30* does not function in the intestine to  
106 control immunity and that it may control the immunity-longevity tradeoff from the nervous  
107 system. To study whether UNC-30 controls the immunity-longevity tradeoff in a cell non-  
108 autonomous manner from the nervous system, we rescued *unc-30* under the control of a pan-  
109 neuronal promoter and exposed the animals to *P. aeruginosa*. As a control, *unc-30* was also  
110 expressed using its native promoter. The results obtained show that UNC-30 expression driven  
111 by its own or the pan-neuronal promoter rescued both the enhanced survival of *unc-30(ok613)*  
112 animals to *P. aeruginosa*-mediated killing (Figure 1G) and the reduced longevity of the animals  
113 grown on heat-killed *E. coli* (Figure 1E). To study the specificity of pathogen susceptibility of  
114 *unc-30(ok613)* animals, we infected them with other human bacterial pathogens, including the  
115 Gram-negative bacterium *Salmonella enterica* strain 1344 and the Gram-positive bacteria  
116 *Staphylococcus aureus* strain NCTCB325. Loss of UNC-30 enhanced the nematode's survival  
117 against all bacterial pathogens studied (Figure 1H-I), suggesting that UNC-30 suppresses *C.*  
118 *elegans* general defense against bacterial pathogens. Because *C. elegans* naturally exhibits an  
119 avoidance behavior when exposed to *P. aeruginosa*, which can be observed in conditions in  
120 which the animals can freely enter and exit the bacterial lawn, we used plates that were  
121 completely covered by bacteria to control for avoidance (full-lawn). The survival of *unc-*  
122 *30(ok613)* animals was also significantly higher than that of wild-type and *unc-30* rescued  
123 animals (Figure 1J). We also observed similar resistance to pathogen-mediated killing when the  
124 animals were exposed to full-lawns of *S. enterica* or *S. aureus* (Figure S3A-B). The neural

125 expression of *unc-30* rescued the survival defect of *unc-30(ok613)* animals (Figures 1G-J).  
126 Consistent with the idea that the resistance of *unc-30(ok613)* animals is not due to enhanced  
127 pathogen avoidance, we found that the lawn occupancy of *unc-30(ok613)* mutants is comparable  
128 to that of wild-type animals (Figure S3C).

129 *C. elegans* feeds on bacteria and the pharyngeal contraction/pumping is a direct measure  
130 of food intake (Cao et al., 2017; Sellegounder et al., 2019; Singh and Aballay, 2019c; Styer et al.,  
131 2008). Thus, we asked whether the resistance to infections and reduction of the lifespan of *unc-*  
132 *30(ok613)* animals could be due to a reduction in pathogen intake. We, therefore, measured the  
133 pharyngeal pumping rates of *unc-30(ok613)* and wild-type animals on *P. aeruginosa* bacterial  
134 lawns as well as on heat-killed *E. coli*. We found that *unc-30(ok613)* animals exhibited pumping  
135 rates comparable to that of wild-type animals (Figure S3D), indicating that the dose of pathogens  
136 is similar in both cases. It has recently been demonstrated that bacterial accumulation in animals  
137 defective in the defecation motor program (DMP) causes intestinal distension that elicits a robust  
138 immune response (Singh and Aballay, 2019c) and modulates longevity (Kumar et al., 2019). We  
139 found that the defecation cycle of *unc-30(ok613)* animals is indistinguishable from that of wild-  
140 type animals (Figure S3E). Certain gene mutations in *C. elegans* affect the reproductive system,  
141 which could lead to reduced progeny or cause total sterility, resulting in increased resistance to  
142 pathogen infection (Berman and Kenyon, 2006; Powell and Ausubel, 2008). In addition, the  
143 tradeoff between immunity and longevity can be dependent on the reproductive dynamics of  
144 some mutant animals (Amrit et al., 2019). Thus, we compared the brood size of *unc-30(ok613)*  
145 and wild-type animals and did not observe any difference in the numbers of neither laid eggs nor  
146 brood size (Figure S4A-B). Taken together, these results suggest that *unc-30* functions in the  
147 nervous system to control a tradeoff between immunity and longevity.

148

### 149 **UNC-30 inhibits the expression of immune and age-related genes**

150 To dissect the UNC-30-dependent immune and longevity mechanisms involved in the control of  
151 defense against pathogen exposure and longevity, we employed transcriptomic analyses to  
152 identify dysregulated immune genes and pathways in uninfected and *P. aeruginosa*-infected *unc-*  
153 *30(ok613)* and wild-type animals (Table S1). To identify gene groups that were controlled by  
154 UNC-30, we performed an unbiased gene enrichment analysis using a Wormbase enrichment  
155 analysis tool, <https://wormbase.org/tools/enrichment/tea/tea.cgi>, (Angeles-Albores et al., 2016),

156 that is specific for *C. elegans* gene data analyses. The 10 gene ontology clusters with the highest  
157 enrichment score of vital biological functions for upregulated and downregulated genes in both  
158 non-infected and infected groups are shown in Figure 2A and S5A-B. Overall, the gene  
159 expression data showed that the most enriched and highly significant upregulated genes were a  
160 part of neuropeptide signaling and immune/defense response pathways in both non-infected and  
161 infected groups (Figure 2A and Table S2). Other genes linked to biological processes such as  
162 metabolism, response to biotic stimuli, and IRE1-mediated unfolded protein response, were also  
163 upregulated in *unc-30(ok613)* animals. Consistently with the role of UNC-30 in the control of  
164 longevity (Figure 1E), genes involved in aging were also significantly enriched (Figure 2A).

165 To identify the potential immune pathways that may play a role in the pathogen  
166 resistance to the UNC-30-deficient animals, we performed a gene enrichment analysis using the  
167 immune gene subset by employing the Worm Exp tool ([https://wormexp.zoologie.uni-](https://wormexp.zoologie.uni-kiel.de/wormexp/)  
168 [kiel.de/wormexp/](https://wormexp.zoologie.uni-kiel.de/wormexp/)) (Yang et al., 2016), which integrates all published expression datasets for *C.*  
169 *elegans* to analyze and generate pathways. We found that pathways required for *C. elegans*  
170 defense against bacterial infections were highly enriched, including the ELT-2, PMK-1, PQM-1,  
171 and DAF-2/DAF-16 insulin pathways (Figure 2B and Table S3) (Aballay et al., 2003; Garsin et  
172 al., 2003; Head et al., 2017; Huffman et al., 2004; Kerry et al., 2006; Kim et al., 2002; Murphy et  
173 al., 2003; Rajan et al., 2019; Shapira et al., 2006; Singh and Aballay, 2006, 2009; Troemel et al.,  
174 2006). We also noticed that several of the PMK-1 and DAF-16-dependent genes were also  
175 controlled by ELT-2 (Figure S6 and Tables S3), indicating that ELT-2-dependent genes may  
176 play a major role in the enhanced resistance to pathogen phenotype of *unc-30(ok613)* animals.  
177 Thus, we confirmed the role of neural UNC-30 in the control of ELT-2-dependent immune  
178 genes, including *lys-1*, *K12H4.7*, *lys-4*, *lys-7*, and *lys-8* (Figure 2C). These results indicate that  
179 UNC-30 regulates *C. elegans* defense against bacterial infections mainly by activating immune  
180 genes, several of which are controlled by the ELT-2 immune transcription factor.

181 We further employed the Worm Exp tool ([https://wormexp.zoologie.uni-](https://wormexp.zoologie.uni-kiel.de/wormexp/)  
182 [kiel.de/wormexp/](https://wormexp.zoologie.uni-kiel.de/wormexp/)) (Yang et al., 2016) to analyze the age determination genes to identify specific  
183 pathways that could be transcriptionally regulated by UNC-30. We found that the SKN-1, MDL-  
184 1, and PQM-1 age determination pathways were highly enriched (Figure 2D and Table S4)  
185 (Riesen et al., 2014; Tepper et al., 2013a; Tepper et al., 2014; Tullet et al., 2008). Although the  
186 SKN-1 cluster had the highest representation factor (Figure 2D), most of the genes up-regulated

187 in *unc-30(ok613)* animals were under the control of the MDL-1 pathway (Figure 2E). Because  
188 the evolutionarily conserved transcription factors, MDL-1 and PQM-1 are known to suppress  
189 longevity and their inactivation results in lifespan extension (Riesen et al., 2014; Tepper et al.,  
190 2013b; Tepper et al., 2014), the upregulation of MDL-1 and PQM-1-dependent genes in *unc-*  
191 *30(ok613)* animals could explain the reduced longevity of the animals. We confirmed the role of  
192 UNC-30 in the control of MDL-1 and PQM-1-dependent genes (Figure 2F). In summary, the  
193 transcriptomic analyses revealed that while neural expression of UNC-30 downregulates the  
194 expression of immune genes controlled by ELT-2 and PMK-1, it upregulates age-related genes  
195 controlled by MDL-1 and PQM-1, indicating that UNC-30 controls a tradeoff between immunity  
196 and longevity.

197

### 198 **UNC-30 functional loss enhances immunity via ELT-2 and PMK-1 and reduces longevity** 199 **via MDL-1 and PQM-1**

200 To test the hypothesis that the enhanced resistance to *P. aeruginosa* infection of *unc-30(ok613)*  
201 animals is due to the upregulation of immune genes, we studied the role of suppression by RNAi  
202 of the immune pathways shown in Figure 2B. We inactivated *elt-2*, *pqm-1*, *pmk-1*, and *daf-16* in  
203 WT and *unc-30(ok613)* animals and exposed them to *P. aeruginosa*. Unlike *daf-16* and *pqm-1*  
204 RNAi (Figure 3A-B), *elt-2* RNAi was able to completely suppress the enhanced resistance to *P.*  
205 *aeruginosa* infection in *unc-30(ok613)* animals (Figure 3C). We also observed partial  
206 suppression of the enhanced pathogen resistance of *unc-30(ok613)* animals by *pmk-1* RNAi  
207 (Figure 3D). The lack of suppression of the phenotype of *unc-30(ok613)* animals by RNAi  
208 inhibition of *daf-16* and *pqm-1* was confirmed using *daf-16* and *pqm-1* mutant animals (Figure  
209 3E-F). We also confirmed the partial suppression of the enhanced resistance to pathogen of *unc-*  
210 *30(ok613)* animals by inhibition of the PMK-1 pathway using *nsy-1(ag3)* and *sek-1(km4)*  
211 animals, which carry mutations in the genes encoding two kinases that function upstream PMK-1  
212 (Figure 3G-H). These results indicate that loss of UNC-30 enhances immunity against infection  
213 by increasing the activity of ELT-2 and the PMK-1 pathway.

214 The Venn diagram shown in Figure 4A indicates a poor overlap between aging and  
215 immune genes, suggesting that the misregulation of different pathways causes the immune and  
216 longevity phenotypes of animals deficient in UNC-30. Thus, we reasoned that the upregulation  
217 of the age-related genes in un-infected *unc-30(ok613)* mutants compared with wild-type animals

218 (Figure 2A) could be responsible for the reduced longevity of *unc-30(ok613)* animals. Consistent  
219 with this idea, a number of the age-related genes that are upregulated in *unc-30(ok613)* animals  
220 have been reported to extend lifespan when mutated or inactivated by RNAi (Figure 4B and  
221 Table S4). Moreover, the majority of age-related genes upregulated in *unc-30(ok613)* mutants  
222 compared with wild-type animals are controlled by MDL-1 and PQM-1 (Figure 2E), which are  
223 known to suppress longevity. Thus, we studied whether inactivation of MDL-1 or PQM-1 could  
224 suppress the decreased longevity of *unc-30(ok613)* animals. As shown in Figures 4C and 4D,  
225 *mdl-1(tm311)* and *pqm-1(ok485)* mutation suppressed the reduced lifespan of *unc-30(ok613)*  
226 animals. Consistent with the idea that higher activity of both MDL-1 and PQM-1 is responsible  
227 for the reduced lifespan of *unc-30(ok613)* animals, the lifespan of the double mutants *mdl-*  
228 *1(tm311);unc-30(ok613)* and *pqm-1(ok485);unc-30(ok613)* is shorter than that of the single  
229 mutants *mdl-1(tm311)* and *pqm-1(ok485)*, respectively (Figures 4C and 4D). To study whether  
230 the longevity of the single mutants is greater than that of the double mutants due to higher PQM-  
231 1 or MDL-1 activity, we inhibited both PQM-1 and MDL-1 in *unc-30(ok613)* animals. As shown  
232 in Figure 4E, the longevity of *mdl-1* RNAi animals is not significantly different than that of *pqm-*  
233 *1(ok485);unc-30(ok613);mdl-1* RNAi animals. Inhibition of SKN-1 by RNAi reduced the  
234 longevity of wild-type animals but had no effect on *unc-30(ok613)* mutants (Figure 4F). This is  
235 expected because, unlike MDL-1 and PQM-1 that suppress longevity, SKN-1 promotes  
236 longevity. Taken together, these results indicate that neuronal UNC-30 suppresses ELT-2- and  
237 PMK-1 mediated immunity while prolonging longevity through the MDL-1 and PQM-1  
238 pathways.

239

#### 240 **Neuronal UNC-30 regulates the immunity-longevity tradeoff via neuropeptide signaling**

241 The subset of misregulated genes most significantly enriched in either infected or uninfected  
242 *unc-30(ok613)* animals corresponds to neuropeptide signaling genes (Figure 2A and Table S2).  
243 To identify potential neurotransmitter pathways that may be involved in the control of the  
244 tradeoff between immunity and longevity, we performed gene enrichment analysis using the  
245 neuropeptide genes subset (Table S5). Our findings show that most of the neuropeptide genes are  
246 transcriptionally controlled by NPR-1 (Figure 5A and Table S5). NPR-1 is a G protein-coupled  
247 receptor similar to neuropeptide Y receptor (NPYR) that controls *C. elegans* immune response  
248 against pathogens (Nakad et al., 2016; Reddy et al., 2009; Reddy et al., 2011; Singh and Aballay,



249 2019c; Styer et al., 2008). Other genes are controlled by miRNA and LIN-28 (Figure 5A and  
250 Table S5). Figure 5B shows confirmation of the misregulation of NPYR/NPR-1-dependent genes  
251 in *unc-30(ok613)* mutants compared to wild-type animals. We also found that the pan-neuronal  
252 expression of *unc-30(ok613)* rescued the changes in expression of NPR-1-dependent  
253 neuropeptide genes (Figure 5B).

254 Because most *unc-30(ok613)* upregulated neuropeptide genes are NPYR/NPR-1-  
255 dependent, we asked whether NPR-1 may be part of the UNC-30 pathway that controls the  
256 immunity-longevity tradeoff. We hypothesized that if *npr-1* acts downstream of *unc-30*, *npr-1*  
257 mutation should suppress the enhanced immunity and reduced longevity of *unc-30(ok613)*  
258 animals. Indeed, we found that the *npr-1(ad609)* mutation was able to suppress the immunity and  
259 longevity phenotypes of *unc-30(ok613)* animals (Figure 5C, 5D, and S7). We further studied  
260 NPR-1-regulated genes and found that, in addition to controlling the immune PMK-1 pathway  
261 (Styer et al., 2008), NPR-1 controls immune genes that are ELT-2 and PQM-1-dependent (Figure  
262 5E and Table S6). Consistent with the suppression of the reduced longevity of *unc-30(ok613)*  
263 animals by mutation in *npr-1*, we found that the *npr-1(ad609)* mutation suppressed the  
264 missregulation of age-related genes observed in *unc-30(ok613)* animals (Figure 5F).

265

### 266 **GABAergic ASG neurons control the UNC-30-modulated immunity-longevity tradeoff**

267 Next, we asked which UNC-30-expressing neuronal cells could be involved in the control of the  
268 immune-longevity tradeoff. As a first step, we employed a two-component system to kill cells by  
269 using a reconstituted caspase (Chelur and Chalfie, 2007) to generate a PVP neuron ablated strain  
270 and that was exposed to *P. aeruginosa*. We focused on PVP because it is well connected to other  
271 UNC-30-expressing neurons, including DD and VD (Figure S8A). We found no significant  
272 difference between the PVP(-) and wild-type animals (Figure 6A), suggesting that the  
273 immunomodulatory function of UNC-30 is not linked to PVP neurons. However, we cannot rule  
274 out the role of DD, VD, and VC in immunity.

275 We next studied whether other UNC-30-expressing cells (ASG, PVD, or OLL sensory  
276 neurons) could control the defense response against pathogen infection. We employed an  
277 interactive tissue-gene expression prediction tool (<http://worm.princeton.edu>) to predict the  
278 expression enrichment level across different cells and tissues. The results obtained revealed that  
279 *unc-30* is highly expressed in ASG, which is an amphid neuron (Figure S8B) (Li and Kim, 2008;

280 Pereira et al., 2015; Pocock and Hobert, 2010). Also, we noticed that some of the neuropeptide  
281 genes, including *flp-6*, *flp-13*, *flp-22*, and *ins-1*, that are upregulated in *unc-30(ok613)* animals  
282 are expressed in ASG neurons (Li and Kim, 2008; Pereira et al., 2015; Pocock and Hobert,  
283 2010). Thus, we studied the effect of ASG ablation in the control of defense against *P.*  
284 *aeruginosa* infection in wild-type and *unc-30(ok613)* animals. We found that ASG(-) animals  
285 exhibited resistance to *P. aeruginosa*-mediated killing similar to that of *unc-30(ok613)* animals  
286 (Figure 6B). The resistance to *P. aeruginosa* infection of *unc-30(ok613)* and ASG(-)::*unc-*  
287 *30(ok613)* animals was also indistinguishable (Figure 6B). In addition, expression of *unc-30* only  
288 in ASG neurons completely suppressed the pathogen resistance of *unc-30(ok613)* animals  
289 (Figure 6C), suggesting that the GABAergic ASG neuron plays a key role in the UNC-30  
290 modulation of immunity. To further confirm the role of ASG neurons in the control of immunity,  
291 we quantified the expression of immune genes and found that they were upregulated in ASG(-)  
292 animals (Figure 6D).

293 We also investigated the lifespan of animals lacking ASG(-) or PVP(-). As shown in  
294 Figure 6E, ASG(-) but not PVP(-) animals exhibited a longer lifespan than control animals. We  
295 also found that ASG ablation partially rescued the short lifespan of *unc-30(ok613)* animals,  
296 suggesting that ASG neurons participate in the control of longevity by UNC-30 (Figure 6F). We  
297 also found that *unc-30* expression in ASG neurons rescued the short lifespan of *unc-30(ok613)*  
298 animals (Figure 6G). In summary, our results suggest that neuronal UNC-30 and neuropeptide  
299 signaling regulate the tradeoff between immunity and longevity controlling the ELT-2 and PMK-  
300 1 immune pathway and the MDL-1 and PQM-1 aging pathways (Figure 7).

301

## 302 Discussion

303 Biological tradeoffs are widely employed by metazoans to maximize the allocation of precious  
304 resources that are critical for organismal homeostasis. However, the mechanisms that control  
305 them at the whole animal level remain obscure. The nervous system provides a perfect partner to  
306 help fine-tune tradeoffs because it can rapidly respond to many types of stimuli and is adept at  
307 controlling opposite functions. (Eastman et al., 1999a; Jin et al., 1994; Westmoreland et al.,  
308 2001). Here, we show that UNC-30 functions in the nervous system from where, together with  
309 neuropeptide signaling, it can control the tradeoff between immunity and longevity. The absence  
310 of UNC-30 results in the upregulation of the expression of age-related genes controlled by MDL-

311 1 and PQM-1 and immune genes controlled by the ELT-2 and PMK-1. Furthermore, the  
312 GABAergic neuron ASG and the NPR-1 neuropeptide signaling are part of the UNC-30 pathway  
313 that controls the balance between immune activation and longevity.

314 Previous studies linked neurotransmitters such as dopamine and octopamine to the  
315 control of immunity via the PMK-1 pathway (Cao and Aballay, 2016; Pinoli et al., 2017;  
316 Sellegounder et al., 2019; Sun et al., 2011) and the X-box binding protein 1 (XBP-1) branch of  
317 the canonical UPR pathway (Cao et al., 2017). Acetylcholine has also been connected to the  
318 control of immunity via the intestinal epithelial Wnt Signaling (Labeed et al., 2018). Furthermore,  
319 serotonin was also found to modulate the immune response via G-protein GOA-1 (*Gao*) in rectal  
320 epithelial cells (Anderson et al., 2013; Hoffman and Aballay, 2019). Unlike other  
321 neurotransmitter pathways, the GABAergic signaling pathway modulates the immune response  
322 to pathogens via the control of the expression of immune genes regulated by ELT-2 and PMK-1.  
323 The UNC-30 pathway also controls genes that are involved in aging (Alcedo and Kenyon, 2004;  
324 Apfeld and Kenyon, 1999; Jeong et al., 2012; Kenyon, 2010; Wolkow et al., 2000). The G  
325 protein-coupled GABA receptor GBB-1 modulates longevity through G protein-PLCb, which  
326 transmits longevity signals to FOXO/DAF-16 (Chun et al., 2015; Yuan et al., 2019). Our studies  
327 highlight a role for neural UNC-30 in the integration of signals that control the balance between  
328 the activation of both immune and longevity pathways that have opposite effects. While UNC-30  
329 suppresses immunity by inhibiting the expression of ELT-2- and PMK-1-dependent genes, it  
330 enhances longevity by inhibiting the activity of MDL-1 and PQM-1. Functional loss of MDL-1  
331 and PQM-1 extends lifespan in *C. elegans* via DAF-2 insulin/IGF-1 (Johnson et al., 2014;  
332 Nakamura et al., 2016; Riesen et al., 2014; Templeman et al., 2018; Tepper et al., 2013b; Tepper  
333 et al., 2014). In addition, PQM-1 functions together with DAF-16 as a key transcriptional  
334 regulator of DAF-2-mediated longevity (Tepper et al., 2013b). However, the lack of significant  
335 enrichment in DAF-16-controlled genes regulated by UNC-30 suggests that PQM-1 may also  
336 control longevity in a DAF-16-independent manner.

337 Our findings suggest that ASG neurons play a key role in controlling the tradeoff  
338 between immunity and longevity. They also express neuropeptides *flp-6*, *flp-13*, *flp-22*, and *ins-1*  
339 (Li and Kim, 2008; Pereira et al., 2015; Pocock and Hobert, 2010), which we found are  
340 upregulated in *unc-30(ok613)* animals. Furthermore, ASG cells respond to neuropeptides *flp-18*  
341 and *flp-21* via *npr-1* (Bargmann, 2006; Li and Kim, 2008; Pereira et al., 2015; Pocock and

342 Hobert, 2010; Rex et al., 2005; Sugiura et al., 2005), which were upregulated in *unc-30(ok613)*  
343 animals. These results argue strongly that ASG neurons are critical in the control of the  
344 longevity-immunity tradeoff. Both PMK-1 and ELT-2 function in the intestine to control  
345 immunity (Bolz et al., 2010; Head et al., 2017; Kerry et al., 2006; Kim et al., 2002; Shapira et al.,  
346 2006). In addition, the role of PQM-1 and MDL-1 in longevity has been linked to the intestine  
347 (Riesen et al., 2014; Tepper et al., 2013b), suggesting that UNC-30 controls the immunity-  
348 longevity tradeoff in a cell non-autonomous manner. A recent example of a tradeoff mechanism  
349 indicates that dietary restriction extends lifespan by downregulating the PMK-1-mediated  
350 immune signaling (Wu et al., 2019). Further work will be required to establish whether this and  
351 other tradeoffs are controlled cell non-autonomously by the nervous system.

352 Our results provide evidence that specific genes and neurons in the nervous system act in  
353 a cell non-autonomous manner to coordinately control immune and aging pathways. Organisms  
354 widely rely on tradeoff mechanisms when a given trait cannot increase without decreasing  
355 another to maintain homeostasis. Given the evolutionary conservation of UNC-30 and the  
356 immune and aging pathways that are neutrally controlled, the identification and characterization  
357 of the cues that the nervous system uses to control the immunity-longevity tradeoff in *C. elegans*  
358 should yield insights into similar mechanisms used across metazoans.

359

## 360 **Materials and Methods**

361

### 362 **Bacterial strains**

363 The bacterial strains used in this study are *Escherichia coli* OP50, *E. coli* HT115(DE3) (Brenner,  
364 1974), *Pseudomonas aeruginosa* PA14, *P. aeruginosa* PA14-GFP (Tan et al., 1999), *Salmonella*  
365 *enterica* Serovar Typhimurium 1344 (Wray and Sojka, 1978), and *Staphylococcus aureus* strain  
366 NCTCB325 (Sifri et al., 2003). Gram-negative bacteria were grown in Luria-Bertani (LB) broth.  
367 *Staphylococcus aureus* strain NCTCB325 was grown in Tryptic Soy Agar prepared with  
368 Nalidixic acid. All bacteria were grown at 37°C.

369

### 370 ***C. elegans* Strains and Growth Conditions**

371 Hermaphrodite *C. elegans* (var. Bristol) wild type (N2) was used as control unless otherwise  
372 indicated. *C. elegans* strains CF1038 *daf-16(mu86)*, KU25 *pmk-1(km25)*, MGH171 *alxIs9 [vha-*  
373 *6p::sid-1::SL2::GFP]*, VC295 *unc-30(ok613)*, RB711 *pqm-1(ok485)*, DA609 *npr-1(ad609)*,

374 CB318 *unc-30(e318)*, CB845 *unc-30(e191)*, SD39 *unc-30(e596)*, GR2245 *skn-1(mg570)*, RB711  
375 *pqm-1(ok485)*, KU4 *sek-1(km4)* and AU3 *nsy-1(ag3)* were obtained from the Caenorhabditis  
376 Genetics Center (University of Minnesota, Minneapolis, MN). *mdl-1(tm311)* was obtained from  
377 National Bioresource Project (NBRP), Japan. *npr-1(ad609);unc-30(ok613)*, *pqm-1(ok485);unc-*  
378 *30(ok613)*, *daf-16(mu86);unc-30(ok613)*, *sek-1(km4);unc-30(ok613)*, *nsy-1;unc-30(ok613)*, *mdl-*  
379 *1(tm311);unc-30(ok613)*, and ASG(-)::*unc-30(ok613)* were obtained by standard genetic crosses.  
380 Rescued strain *unc-30(ok613);Punc-30::unc-30*, neuronal rescued strain *unc-30(ok613);Prab-*  
381 *3::unc-30* and *unc-30* rescued in ASG neuron-specific, *unc-30(ok613);Pgcy-15::unc-30* were  
382 generated as described below. The ASG(-) ablated Ex[Ptax-2::CZ::ced-3(p17)::unc-54 3'UTR +  
383 Plim-6::ced-3(p15)-NZ::unc-54 3'UTR, pRF4] and PVP(-) ablated Ex[Podr-2b::CZ::ced-  
384 3(p17)::unc-54 3'UTR, Punc-53::ced-3(p15)-NZ::unc-54 3'UTR, pRF4] were also generated as  
385 described below. The strains were crossed with the wild-type laboratory N2.

386 All strains were grown at 20°C on nematode growth medium (NGM) plates seeded with  
387 *E. coli* OP50 as the food source (Brenner, 1974) unless otherwise indicated. The recipe for the  
388 control NGM plates is: 3 g/l NaCl, 3 g/l peptone, 20 g/l agar, 5 µg/ml cholesterol, 1 mM MgSO<sub>4</sub>,  
389 1 mM CaCl<sub>2</sub>, and 25 mM potassium phosphate buffer (pH 6.0). The NGM plates were without  
390 antibiotics except indicated.

391

## 392 RNA Interference (RNAi)

393 Knockdown of targeted genes was obtained using RNAi by feeding the animal with *E. coli* strain  
394 HT115(DE3) expressing double-stranded RNA (dsRNA) homologous to a target gene (Fraser et  
395 al., 2000; Timmons and Fire, 1998). RNAi was carried out as described previously (Sun et al.,  
396 2011; Singh and Aballay, 2017). Briefly, *E. coli* with the appropriate vectors were grown in LB  
397 broth containing ampicillin (100 µg/mL) and tetracycline (12.5 µg/mL) at 37°C overnight and  
398 plated onto NGM plates containing 100 µg/mL ampicillin and 3 mM isopropyl β-D-  
399 thiogalactoside (IPTG) (RNAi plates). RNAi-expressing bacteria were grown at 37°C for 12-14  
400 hours. Gravid adults were transferred to RNAi-expressing bacterial lawns and allowed to lay  
401 eggs for 2-3 hours. The gravid adults were removed, and the eggs were allowed to develop at  
402 20°C to young adults. This was repeated for another generation (except for ELT-2 RNAi) before  
403 the animals were used in the experiments. The RNAi clones were from the Ahringer RNAi  
404 library.

405

#### 406 ***C. elegans* Survival Assay on Bacterial Pathogens**

407 *P. aeruginosa* and *S. enterica* were incubated in LB medium. *S. aureus* was incubated in TSA  
408 medium with nalidixic acid (10 µg/mL). The incubations were done at 37°C with gentle shaking  
409 for 12 hours. *P. aeruginosa* and *S. enterica* were grown on modified NGM agar medium (0.35%  
410 peptone). For partial lawn assays, 20 µl of the overnight bacterial cultures were seeded at the  
411 center of the relevant agar plates without spreading. For full lawn experiments, 20 µl of the  
412 bacterial culture were seeded and spread all over the surface of the agar plate. No antibiotic was  
413 used for *P. aeruginosa* and *S. enterica*, while nalidixic acid (10 µg/mL) was used for the TSA  
414 plates for *S. aureus*. The seeded plates were allowed to grow for 12 at 37°C. The plates were left  
415 at room temperature for at least 1 hr before the infection experiments. 20 synchronized young  
416 adult worms were transferred to the plates for infection, and three technical replicate plates were  
417 set up for each condition (n = 60 animals) and the experiments were performed in triplicate  
418 (Table 7). The plates were then incubated at 25°C. Scoring was performed every 12 hr for *P.*  
419 *aeruginosa* and *S. aureus*, while 24 hr for *S. enterica*. Worms were scored as dead if the animals  
420 did not respond to touch by a worm pick or lack of pharyngeal pumping. Live animals were  
421 transferred to fresh pathogen lawns each day. All *C. elegans* killing assays were performed three  
422 times independently.

423

#### 424 **Bacterial lawn avoidance assay**

425 Bacterial lawn avoidance assays were performed by 20 mL of *P. aeruginosa* PA14 on 3.5-cm  
426 modified NGM agar (0.35% peptone) plates and cultured at 37°C overnight to have a partial  
427 lawn. The modified NGM plates were left to cool to room temperature for about 1 hour, twenty  
428 young adult animals grown on *E. coli* OP50 were transferred to the center of each bacterial lawn  
429 after it. The number of animals on the bacterial lawns was counted at 12 and 24 hours after  
430 exposure.

431

#### 432 **Pharyngeal pumping rate assay**

433 Wild-type and *unc-30(ok613)* animals were synchronized by placing 20 gravid adult worms on  
434 NGM plates seeded with *E. coli* OP50 and allowing them to lay eggs for 60 min at 20°C. The  
435 gravid adult worms were then removed, and the eggs were allowed to hatch and grow at 20°C

436 until they reached the young adult stage. The synchronized worms were transferred to NGM  
437 plates fully seeded with *P. aeruginosa* for 24 hours at 25°C. Worms were observed under the  
438 microscope with a focus on the pharynx. The number of contractions of the pharyngeal bulb was  
439 counted over 60 s. Counting was conducted in triplicate and averaged to obtain pumping rates.

440

#### 441 **Defecation rate assay**

442 Wild-type and mutant animals were synchronized by placing 20 gravid adult worms on NGM  
443 plates seeded with *E. coli* OP50 and allowing them to lay eggs for 60 min at 20°C. The gravid  
444 adult worms were then removed, and the eggs were allowed to hatch and grow at 20°C until they  
445 reached the young adult stage. The synchronized worms were transferred to NGM plates fully  
446 seeded with *P. aeruginosa* for 24 hours at 25°C. Worms were observed under a microscope at  
447 room temperature. For each worm, an average of 10 intervals between two defecation cycles was  
448 measured. The defecation cycle was identified as a peristaltic contraction beginning at the  
449 posterior body of the animal and propagating to the anterior part of the animal followed by feces  
450 expulsion.

451

#### 452 **Brood Size Assay**

453 The brood size assay was done following the earlier described methods (Kenyon et al., 1993;  
454 Otariqho and Aballay, 2020). Ten L4 animals from egg-synchronized populations were  
455 transferred to individual NGM plates (seeded with *E. coli* OP50) (described above) and  
456 incubated at 20°C. The animals were transferred to fresh plates every 24 hours. The progenies  
457 were counted and removed every day.

458

#### 459 ***C. elegans* Longevity Assays**

460 Longevity assays were performed on NGM plates containing live, heat killed, or UV-killed *E.*  
461 *coli* strains HT115 or OP50 as described earlier (Otariqho and Aballay, 2020; Sun et al.,  
462 2011)(Kumar et al., 2019; Sutphin and Kaeberlein, 2009). Animals were scored as alive, dead, or  
463 gone each day. Animals that failed to display touch-provoked or pharyngeal movement were  
464 scored as dead. Experimental groups contained 60 to 100 animals and the experiments were  
465 performed in triplicate (Table 8). The assays were performed at 20°C.

466

## 467 **Intestinal Bacterial Loads Visualization and Quantification**

468 Intestinal bacterial loads were visualized and quantified as described earlier (Otarigho and  
469 Aballay, 2020; Sun et al., 2011). Briefly, *P. aeruginosa*-GFP lawns were prepared as described  
470 above. The plates were cooled to ambient temperature for at least an hour before seeding with  
471 young gravid adult hermaphroditic animals and the setup was placed at 25°C for 24 hours. The  
472 animals were transferred from *P. aeruginosa*-GFP plates to the center of fresh *E. coli* plates for  
473 10 min to eliminate *P. aeruginosa*-GFP on their body. The step was repeated two times more to  
474 further eliminate external *P. aeruginosa*-GFP left from earlier steps. Subsequently, ten animals  
475 were collected and used for fluorescence imaging to visualize the bacterial load while another ten  
476 were transferred into 100 µL of PBS plus 0.01% Triton X-100 and ground. Serial dilutions of the  
477 lysates ( $10^1$ - $10^{10}$ ) were seeded onto LB plates containing 50 µg/mL of kanamycin to select for *P.*  
478 *aeruginosa*-GFP cells and grown overnight at 37 °C. Single colonies were counted the next day  
479 and represented as the number of bacterial cells or CFU per animal.

480

## 481 **Fluorescence and bloating Imaging**

482 Fluorescence and bloating imaging was carried out as described previously (Otarigho and  
483 Aballay, 2020; Singh and Aballay, 2019a, c). Briefly, animals were anesthetized using an M9  
484 salt solution containing 50 mM sodium azide and mounted onto 2% agar pads. The animals were  
485 then visualized for bacterial load using a Leica M165 FC fluorescence stereomicroscope. The  
486 diameter of the intestinal lumen was measured using Fiji-ImageJ software. At least 10 animals  
487 were used for each condition.

488

## 489 **RNA Sequencing and Bioinformatic Analyses**

490 Approximately 40 gravid WT and *unc-30(ok613)* animals were placed for 3 hours on 10-cm  
491 NGM plates (seeded with *E. coli* OP50) (described above) to have a synchronized population,  
492 which developed and grew to L4 larval stage at 20°C. Animals were washed off the plates with  
493 M9 and frozen in QIAzol by ethanol/dry ice and stored at -80 prior to RNA extraction. Total  
494 RNA was extracted using the RNeasy Plus Universal Kit (Qiagen, Netherlands). Residual  
495 genomic DNA was removed using TURBO DNase (Life Technologies, Carlsbad, CA). A total of  
496 6 µg of total RNA was reverse-transcribed with random primers using the High-Capacity cDNA  
497 Reverse Transcription Kit (Applied Biosystems, Foster City, CA).



498 The library construction and RNA sequencing in Illumina NovaSeq 6000 platform was  
499 done following the method described by (Zhu et al., 2018) and (Yao et al., 2018) pair-end reads  
500 of 150 bp were obtained for subsequent data analysis. The RNA sequence data were analyzed  
501 using a workflow constructed for Galaxy (<https://usegalaxy.org>) as described (Afgan et al., 2018;  
502 Afgan et al., 2016; Amrit and Ghazi, 2017). The RNA reads were aligned to the *C. elegans*  
503 genome (WS271) using the aligner STAR. Counts were normalized for sequencing depth and  
504 RNA composition across all samples. Differential gene expression analysis was then performed  
505 on normalized samples. Genes exhibiting at least two-fold change were considered differentially  
506 expressed. The differentially expressed genes were subjected SimpleMine tools from wormbase  
507 (<https://www.wormbase.org/tools/mine/simplemine.cgi>) to generate information such as  
508 wormBase ID and gene name, which are employed for further analyses.  
509 Gene ontology analysis was performed using the WormBase IDs in DAVID Bioinformatics  
510 Database (<https://david.ncifcrf.gov>) (Dennis et al., 2003) and validated using a *C. elegans* data  
511 enrichment analysis tool (<https://wormbase.org/tools/enrichment/tea/tea.cgi>). Immune pathways  
512 were obtained using the Worm Exp version 1 ([http://wormexp.zoologie.uni-  
513 kiel.de/wormexp/](http://wormexp.zoologie.uni-kiel.de/wormexp/))(Yang et al., 2016). The Venn diagrams were obtained using the web tool  
514 InteractiVenn (<http://www.interactivenn.net>) (Heberle et al., 2015) and bioinformatics and  
515 evolutionary genomics tool (<http://bioinformatics.psb.ugent.be/webtools/Venn/>). Tissue-gene  
516 expression prediction was used to simulate the expression pattern of UNC-30  
517 (<http://worm.princeton.edu>) (Kaletsky et al., 2018). While neuron wiring was done using the  
518 database of synaptic connectivity of *C. elegans* for computation (White et al., 1986)  
519 <http://ims.dse.ibaraki.ac.jp/ccep-tool/>.

520

### 521 **RNA Isolation and Quantitative Reverse Transcription-PCR (qRT-PCR)**

522 Animals were synchronized and total RNA extraction was done following the protocol described  
523 above. qRT-PCR was conducted using the Applied Biosystems One-Step Real-time PCR  
524 protocol using SYBR Green fluorescence (Applied Biosystems) on an Applied Biosystems  
525 7900HT real-time PCR machine in 96-well-plate format. Twenty-five-microliter reactions were  
526 analyzed as outlined by the manufacturer (Applied Biosystems). The relative fold-changes of the  
527 transcripts were calculated using the comparative  $CT(2^{-\Delta\Delta CT})$  method and normalized to pan-actin  
528 (*act-1*, -3, -4). The cycle thresholds of the amplification were determined using StepOnePlus™

529 Real-Time PCR System Software v2.3 (Applied Biosystems). All samples were run in triplicate.  
530 The primer sequences were available upon request and presented in Table S9.

531

### 532 **Generation of transgenic *C. elegans***

533 To generate *unc-30* rescue animals, the *unc-30* DNA was amplified from the genomic DNA of  
534 Bristol N2 *C. elegans* adult worms. Plasmid pPD160\_ *Punc-30\_ unc-30* was constructed by  
535 linearization of plasmid pPD160\_ *Punc-30* using XbaI and SmaI restriction digestion enzymes.  
536 The amplified *unc-30* DNA was cloned behind its native promoter in the plasmid pPD160\_ *Punc-*  
537 *30*, between XbaI and SmaI sites. For the neuronal rescue strain, the plasmid pPD95\_77\_ *Prab-*  
538 *3\_ unc-30* was constructed by cloning the amplified *unc-30* DNA into KpnI/HindIII digested  
539 pPD95\_77\_ *Prab-3* under the promoter of *rab-3*. The constructs were purified and sequenced.  
540 Young adult hermaphrodite *unc-30(ok613)* *C. elegans* were transformed by microinjection of  
541 plasmids into the gonad as described (Mello and Fire, 1995; Mello et al., 1991). Briefly, a  
542 mixture containing pPD160\_ *Punc-30\_ unc-30* (40 ng/μl) and *Pmyo-3::mCherry* pCFJ104 (5  
543 ng/μl) that drives the expression of mCherry to the muscle as a transformation marker were  
544 injected into the animals. For the neuronal rescue, a mixture containing pPD95\_77\_ *Prab-3\_ unc-*  
545 *30* plasmids (40 ng/μl) and *Pmyo-2::mCherry* (5 ng/μl) pCFJ90 that drives the expression of  
546 mCherry to the pharynx as a transformation marker were injected into the animals.

547 The neuron ablated strains were generated by employing a two-component system  
548 reconstituted caspase (recCaspase) for selective ablation of targeted cells (Chelur and Chalfie,  
549 2007). The ASG ablated neuron was done by separately cloning the promoters of *tax-2* and *lim-6*  
550 in the recCaspases plasmids. Briefly, a 1817bp segment of the *tax-2* promoter was cloned in the  
551 CZ-*ced-3(p17): )::unc-54* 3'UTR plasmid at the Sph I and EcoR I site to generate the *Ptax-*  
552 *2::CZ::ced-3(p17)::unc-54* 3'UTR plasmid, and a 5001bp segment of the *Lim-6* promoter was  
553 cloned in the *ced-3(p15)+NZ:: unc-54* 3'UTR plasmid at the Sph I and EcoR I site to generate  
554 the *Plim-6::ced-3(p15)-NZ::unc-54* 3'UTR plasmid. A mixture containing *Ptax-2-CZ- ced-*  
555 *3(p17)-unc-54* 3'UTR, *Plim-6- ced-3(p15)-NZ-unc-54* 3'UTR of 25ng/μL, and the roller marker  
556 pRF4 *rol-6(su1006)* (50ng/μL) was injected into the N2 young animals. To rescue *unc-30* in  
557 ASG neurons, *gcy-15* promoter (1987bp) and *unc-30* (5042bp) were amplified from gDNA. The  
558 *unc-30* fragment was cloned downstream of the *Pgcy-15* by in-fusion PCR to obtain *Pgcy-*  
559 *15::unc-30*, which was cloned into pPD95.77 between the Sph I and EcoR I sites to generate

560 pPD95\_77\_7\_Pgcy-15::*unc-30*. The ASG neuron-specific rescue strain *unc-30(ok613);Pgcy-*  
561 *15::*unc-30* was generated by injecting plasmid pPD95\_77\_7\_Pgcy-15::*unc-30* (25 ng/μl) with  
562 *Pmyo-2::mCherry* (10 ng/μl) as a co-injection marker into the *unc-30(ok613)* animals.*

563 The PVP ablation was done by separately cloning the promoters of *odr-2* b isoform and  
564 *unc-53* in the recCaspases plasmids. Briefly, a 2661bp segment of the *odr-2* b isoform was  
565 cloned in the *CZ::ced-3(p17)::unc-54* 3'UTR plasmid at the Sph I and EcoR I site to obtain the  
566 *Podr-2b::CZ::ced-3(p17)::unc-54* 3'UTR plasmid and a segment of 3012bp of *unc-53* was  
567 cloned in the *ced-3(p15)-NZ::unc-54* 3'UTR plasmid at the Sph I and EcoR I site to obtain the  
568 *Punc-53-ced-3(p15)-NZ-unc-54* 3'UTR plasmid. A mixture containing 25ng/μL of the *Podr-2b-*  
569 *CZ-ced-3(p17)-unc-54* 3'UTR plasmid, 25ng/μL of the *Punc-53-ced-3(p15)-NZ-unc-54* 3'UTR  
570 plasmid, and 50ng/μL of the roller marker pRF4 *rol-6(su1006)* was injected into N2 young  
571 animals. The successful transformation was determined by the identification of the selection  
572 marker. At least three independent lines carrying extrachromosomal arrays were obtained for  
573 each construct. Only worms with dominant roller phenotypes were selected for further  
574 experiment. Primers used in the generation of transgenic animals are shown in Table S9.

575

## 576 **Quantification and Statistical Analysis**

577 Statistical analysis was performed with Prism 8 version 8.1.2 (GraphPad). All error bars  
578 represent the standard deviation (SD). The two-sample t test was used when needed, and the data  
579 were judged to be statistically significant when  $p < 0.05$ . In the figures, asterisks (\*) denote  
580 statistical significance as follows: ns, not significant, \*,  $p < 0.05$ , \*\*,  $p < 0.001$ , \*\*\*,  $p < 0.0001$ ,  
581 as compared with the appropriate controls. The Kaplan-Meier method was used to calculate the  
582 survival fractions, and statistical significance between survival curves was determined using the  
583 log-rank test. All experiments were performed at least three times.

584

## 585 **ACKNOWLEDGMENTS**

586 This work was fully supported by NIH grants GM0709077 and AI117911 (to A.A.). Most strains  
587 used in this study were obtained from the Caenorhabditis Genetics Center (CGC), which is  
588 funded by the NIH Office of Research Infrastructure Programs (P40 OD010440) and the  
589 National BioResource Project (NBRP) of Japan.

590

591 **AUTHOR CONTRIBUTIONS**

592 B.O and A.A. conceived and designed the experiments. B.O. performed the experiments. B.O.  
593 and A.A. analyzed the data and wrote the paper.

594

595 **DECLARATION OF INTERESTS**

596 The authors declare no competing interests.

597 **References**

- 598 Aballay, A., Drenkard, E., Hilbun, L.R., and Ausubel, F.M. (2003). *Caenorhabditis elegans*  
599 innate immune response triggered by *Salmonella enterica* requires intact LPS and is mediated by  
600 a MAPK signaling pathway. *Current Biology* *13*, 47-52.
- 601 Afgan, E., Baker, D., Batut, B., Van Den Beek, M., Bouvier, D., Čech, M., Chilton, J., Clements,  
602 D., Coraor, N., and Grüning, B.A. (2018). The Galaxy platform for accessible, reproducible and  
603 collaborative biomedical analyses: 2018 update. *Nucleic acids research* *46*, W537-W544.
- 604 Afgan, E., Baker, D., Van den Beek, M., Blankenberg, D., Bouvier, D., Čech, M., Chilton, J.,  
605 Clements, D., Coraor, N., and Eberhard, C. (2016). The Galaxy platform for accessible,  
606 reproducible and collaborative biomedical analyses: 2016 update. *Nucleic acids research* *44*,  
607 W3-W10.
- 608 Alcedo, J., and Kenyon, C. (2004). Regulation of *C. elegans* longevity by specific gustatory and  
609 olfactory neurons. *Neuron* *41*, 45-55.
- 610 Amrit, F.R., and Ghazi, A. (2017). Transcriptomic Analysis of *C. elegans* RNA Sequencing Data  
611 Through the Tuxedo Suite on the Galaxy Project. *JoVE (Journal of Visualized Experiments)*,  
612 e55473.
- 613 Amrit, F.R., Naim, N., Ratnappan, R., Loose, J., Mason, C., Steenberge, L., McClendon, B.T.,  
614 Wang, G., Driscoll, M., and Yanowitz, J.L. (2019). The longevity-promoting factor, TCER-1,  
615 widely represses stress resistance and innate immunity. *Nature communications* *10*, 1-16.
- 616 Anderson, A., Laurenson-Schafer, H., Partridge, F.A., Hodgkin, J., and McMullan, R. (2013).  
617 Serotonergic chemosensory neurons modify the *C. elegans* immune response by regulating G-  
618 protein signaling in epithelial cells. *PLoS Pathog* *9*, e1003787.
- 619 Angeles-Albores, D., Lee, R.Y., Chan, J., and Sternberg, P.W. (2016). Tissue enrichment  
620 analysis for *C. elegans* genomics. *BMC bioinformatics* *17*, 366.
- 621 Apfeld, J., and Kenyon, C. (1999). Regulation of lifespan by sensory perception in  
622 *Caenorhabditis elegans*. *Nature* *402*, 804-809.
- 623 Ayres, J.S. (2020). Immunometabolism of infections. *Nature Reviews Immunology* *20*, 79-80.
- 624 Backhed, F., Bugianesi, E., Christofk, H., Dikic, I., Gupta, R., Mair, W.B., O'Neill, L.A., Ralser,  
625 M., Sabatini, D.M., and Tschop, M. (2019). The next decade of metabolism. *Nat Metabolism* *1*,  
626 2-4.
- 627 Bargmann, C.I. (2006). Chemosensation in *C. elegans*. In *WormBook: The Online Review of C.*  
628 *elegans Biology* [Internet] (WormBook).
- 629 Berman, J.R., and Kenyon, C. (2006). Germ-cell loss extends *C. elegans* life span through  
630 regulation of DAF-16 by kri-1 and lipophilic-hormone signaling. *Cell* *124*, 1055-1068.
- 631 Bird, L. (2019). Getting enough energy for immunity. *Nature Reviews Immunology* *19*, 269-269.

- 632 Bolz, D.D., Tenor, J.L., and Aballay, A. (2010). A conserved PMK-1/p38 MAPK is required in  
633 *Caenorhabditis elegans* tissue-specific immune response to *Yersinia pestis* infection. *Journal of*  
634 *Biological Chemistry* 285, 10832-10840.
- 635 Brenner, S. (1974). The genetics of *Caenorhabditis elegans*. *Genetics* 77, 71-94.
- 636 Cao, X., and Aballay, A. (2016). Neural inhibition of dopaminergic signaling enhances immunity  
637 in a cell-non-autonomous manner. *Current Biology* 26, 2329-2334.
- 638 Cao, X., Kajino-Sakamoto, R., Doss, A., and Aballay, A. (2017). Distinct roles of sensory  
639 neurons in mediating pathogen avoidance and neuropeptide-dependent immune regulation. *Cell*  
640 *reports* 21, 1442-1451.
- 641 Chávez, V., Mohri-Shiomi, A., Maadani, A., Vega, L.A., and Garsin, D.A. (2007). Oxidative  
642 stress enzymes are required for DAF-16-mediated immunity due to generation of reactive  
643 oxygen species by *Caenorhabditis elegans*. *Genetics* 176, 1567-1577.
- 644 Chelur, D.S., and Chalfie, M. (2007). Targeted cell killing by reconstituted caspases.  
645 *Proceedings of the National Academy of Sciences* 104, 2283-2288.
- 646 Chun, L., Gong, J., Yuan, F., Zhang, B., Liu, H., Zheng, T., Yu, T., Xu, X.S., and Liu, J. (2015).  
647 Metabotropic GABA signalling modulates longevity in *C. elegans*. *Nature communications* 6, 1-  
648 10.
- 649 Cinar, H., Keles, S., and Jin, Y. (2005). Expression profiling of GABAergic motor neurons in  
650 *Caenorhabditis elegans*. *Current Biology* 15, 340-346.
- 651 Dennis, G., Sherman, B.T., Hosack, D.A., Yang, J., Gao, W., Lane, H.C., and Lempicki, R.A.  
652 (2003). DAVID: database for annotation, visualization, and integrated discovery. *Genome*  
653 *biology* 4, R60.
- 654 Eastman, C., Horvitz, H.R., and Jin, Y. (1999a). Coordinated Transcriptional Regulation of the  
655 *unc-25* Glutamic Acid Decarboxylase and the *unc-47* GABA Vesicular Transporter by the  
656 *Caenorhabditis elegans* UNC-30 Homeodomain Protein. *Journal of Neuroscience* 19, 6225-6234.
- 657 Eastman, C., Horvitz, H.R., and Jin, Y. (1999b). Coordinated Transcriptional Regulation of the  
658 *unc-25* Glutamic Acid Decarboxylase and the *unc-47* GABA Vesicular Transporter by the  
659 *Caenorhabditis elegans* UNC-30 Homeodomain Protein. *Journal of Neuroscience* 19, 6225-6234.
- 660 Franceschi, C., Garagnani, P., Parini, P., Giuliani, C., and Santoro, A. (2018). Inflammaging: a  
661 new immune–metabolic viewpoint for age-related diseases. *Nature Reviews Endocrinology* 14,  
662 576-590.
- 663 Ganeshan, K., and Chawla, A. (2014). Metabolic regulation of immune responses. *Annual*  
664 *review of immunology* 32, 609-634.
- 665 Ganeshan, K., Nikkanen, J., Man, K., Leong, Y.A., Sogawa, Y., Maschek, J.A., Van Ry, T.,  
666 Chagwedera, D.N., Cox, J.E., and Chawla, A. (2019). Energetic trade-offs and hypometabolic  
667 states promote disease tolerance. *Cell* 177, 399-413. e312.
- 668 Garcia, S.M., Casanueva, M.O., Silva, M.C., Amaral, M.D., and Morimoto, R.I. (2007).  
669 Neuronal signaling modulates protein homeostasis in *Caenorhabditis elegans* post-synaptic  
670 muscle cells. *Genes & development* 21, 3006-3016.
- 671 Garigan, D., Hsu, A.-L., Fraser, A.G., Kamath, R.S., Ahringer, J., and Kenyon, C. (2002).  
672 Genetic analysis of tissue aging in *Caenorhabditis elegans*: a role for heat-shock factor and  
673 bacterial proliferation. *Genetics* 161, 1101-1112.
- 674 Garsin, D.A., Villanueva, J.M., Begun, J., Kim, D.H., Sifri, C.D., Calderwood, S.B., Ruvkun, G.,  
675 and Ausubel, F.M. (2003). Long-lived *C. elegans* *daf-2* mutants are resistant to bacterial  
676 pathogens. *Science* 300, 1921-1921.

677 Gendrel, M., Atlas, E.G., and Hobert, O. (2016). A cellular and regulatory map of the  
678 GABAergic nervous system of *C. elegans*. *Elife* 5, e17686.

679 Hajdu-Cronin, Y.M., Chen, W.J., and Sternberg, P.W. (2004). The L-type cyclin CYL-1 and the  
680 heat-shock-factor HSF-1 are required for heat-shock-induced protein expression in  
681 *Caenorhabditis elegans*. *Genetics* 168, 1937-1949.

682 Head, B.P., Olaitan, A.O., and Aballay, A. (2017). Role of GATA transcription factor ELT-2 and  
683 p38 MAPK PMK-1 in recovery from acute *P. aeruginosa* infection in *C. elegans*. *Virulence* 8,  
684 261-274.

685 Heberle, H., Meirelles, G.V., da Silva, F.R., Telles, G.P., and Minghim, R. (2015).  
686 InteractiVenn: a web-based tool for the analysis of sets through Venn diagrams. *BMC*  
687 *bioinformatics* 16, 169.

688 Hoffman, C., and Aballay, A. (2019). Role of neurons in the control of immune defense. *Current*  
689 *opinion in immunology* 60, 30-36.

690 Huffman, D.L., Abrami, L., Sasik, R., Corbeil, J., van der Goot, F.G., and Aroian, R.V. (2004).  
691 Mitogen-activated protein kinase pathways defend against bacterial pore-forming toxins.  
692 *Proceedings of the National Academy of Sciences* 101, 10995-11000.

693 Jeong, D.-E., Artan, M., Seo, K., and Lee, S.-J. (2012). Regulation of lifespan by chemosensory  
694 and thermosensory systems: findings in invertebrates and their implications in mammalian aging.  
695 *Frontiers in genetics* 3, 218.

696 Jin, Y., Hoskins, R., and Horvitz, H.R. (1994). Control of type-D GABAergic neuron  
697 differentiation by *C. elegans* UNC-30 homeodomain protein. *Nature* 372, 780-783.

698 Johnson, D.W., Llop, J.R., Farrell, S.F., Yuan, J., Stolzenburg, L.R., and Samuelson, A.V.  
699 (2014). The *Caenorhabditis elegans* Myc-Mondo/Mad complexes integrate diverse longevity  
700 signals. *PLoS Genet* 10, e1004278.

701 Jung, J., Zeng, H., and Horng, T. (2019). Metabolism as a guiding force for immunity. *Nature*  
702 *cell biology* 21, 85-93.

703 Kaiser, A., Schmidt, M., Huber, O., Frietsch, J.J., Scholl, S., Heidel, F.H., Hochhaus, A., Müller,  
704 J.P., and Ernst, T. (2020). SIRT7: an influence factor in healthy aging and the development of  
705 age-dependent myeloid stem-cell disorders. *Leukemia*, 1-11.

706 Kaletsky, R., Yao, V., Williams, A., Runnels, A.M., Tadych, A., Zhou, S., Troyanskaya, O.G.,  
707 and Murphy, C.T. (2018). Transcriptome analysis of adult *Caenorhabditis elegans* cells reveals  
708 tissue-specific gene and isoform expression. *PLoS genetics* 14, e1007559.

709 Kenyon, C., Chang, J., Gensch, E., Rudner, A., and Tabtiang, R. (1993). A *C. elegans* mutant  
710 that lives twice as long as wild type. *Nature* 366, 461.

711 Kenyon, C.J. (2010). The genetics of ageing. *Nature* 464, 504-512.

712 Kerry, S., TeKippe, M., Gaddis, N.C., and Aballay, A. (2006). GATA transcription factor  
713 required for immunity to bacterial and fungal pathogens. *PLoS One* 1, e77.

714 Kim, D.H., Feinbaum, R., Alloing, G., Emerson, F.E., Garsin, D.A., Inoue, H., Tanaka-Hino, M.,  
715 Hisamoto, N., Matsumoto, K., and Tan, M.-W. (2002). A conserved p38 MAP kinase pathway in  
716 *Caenorhabditis elegans* innate immunity. *Science* 297, 623-626.

717 Kuchroo, V.K., Ohashi, P.S., Sartor, R.B., and Vinuesa, C.G. (2012). Dysregulation of immune  
718 homeostasis in autoimmune diseases. *Nature medicine* 18, 42-47.

719 Kumar, S., Egan, B.M., Kocsisova, Z., Schneider, D.L., Murphy, J.T., Diwan, A., and Kornfeld,  
720 K. (2019). Lifespan extension in *C. elegans* caused by bacterial colonization of the intestine and  
721 subsequent activation of an innate immune response. *Developmental cell* 49, 100-117. e106.

- 722 Kurup, N., and Jin, Y. (2016). Neural circuit rewiring: insights from DD synapse remodeling. In  
723 Worm (Taylor & Francis), p. e1129486.
- 724 Labed, S.A., Wani, K.A., Jagadeesan, S., Hakkim, A., Najibi, M., and Irazoqui, J.E. (2018).  
725 Intestinal epithelial Wnt signaling mediates acetylcholine-triggered host defense against  
726 infection. *Immunity* 48, 963-978. e963.
- 727 Li, C., and Kim, K. (2008). Neuropeptides. *WormBook: the online review of C. elegans biology*,  
728 1.
- 729 Libert, S., Chao, Y., Chu, X., and Pletcher, S.D. (2006). Trade-offs between longevity and  
730 pathogen resistance in *Drosophila melanogaster* are mediated by NF $\kappa$ B signaling. *Aging cell* 5,  
731 533-543.
- 732 Libina, N., Berman, J.R., and Kenyon, C. (2003). Tissue-specific activities of *C. elegans* DAF-16  
733 in the regulation of lifespan. *Cell* 115, 489-502.
- 734 McIntire, S.L., Reimer, R.J., Schuske, K., Edwards, R.H., and Jorgensen, E.M. (1997).  
735 Identification and characterization of the vesicular GABA transporter. *Nature* 389, 870-876.
- 736 McIntire, S.L., Jorgensen, E., and Horvitz, H.R. (1993a). Genes required for GABA function in  
737 *Caenorhabditis elegans*. *Nature* 364, 334-337.
- 738 McIntire, S.L., Jorgensen, E., Kaplan, J., and Horvitz, H.R. (1993b). The GABAergic nervous  
739 system of *Caenorhabditis elegans*. *Nature* 364, 337-341.
- 740 Mello, C., and Fire, A. (1995). DNA transformation. In *Methods in cell biology* (Elsevier), pp.  
741 451-482.
- 742 Mello, C.C., Kramer, J.M., Stinchcomb, D., and Ambros, V. (1991). Efficient gene transfer in *C.*  
743 *elegans*: extrachromosomal maintenance and integration of transforming sequences. *The EMBO*  
744 *journal* 10, 3959-3970.
- 745 Mohri-Shiomi, A., and Garsin, D.A. (2008). Insulin signaling and the heat shock response  
746 modulate protein homeostasis in the *Caenorhabditis elegans* intestine during infection. *Journal of*  
747 *Biological Chemistry* 283, 194-201.
- 748 Morris, J.Z., Tissenbaum, H.A., and Ruvkun, G. (1996). A phosphatidylinositol-3-OH kinase  
749 family member regulating longevity and diapause in *Caenorhabditis elegans*. *Nature* 382, 536-  
750 539.
- 751 Murphy, C.T., McCarroll, S.A., Bargmann, C.I., Fraser, A., Kamath, R.S., Ahringer, J., Li, H.,  
752 and Kenyon, C. (2003). Genes that act downstream of DAF-16 to influence the lifespan of  
753 *Caenorhabditis elegans*. *Nature* 424, 277-283.
- 754 Nakad, R., Snoek, L.B., Yang, W., Ellendt, S., Schneider, F., Mohr, T.G., Rösingh, L., Masche,  
755 A.C., Rosenstiel, P.C., and Dierking, K. (2016). Contrasting invertebrate immune defense  
756 behaviors caused by a single gene, the *Caenorhabditis elegans* neuropeptide receptor gene *npr-1*.  
757 *BMC genomics* 17, 1-20.
- 758 Nakamura, S., Karalay, Ö., Jäger, P.S., Horikawa, M., Klein, C., Nakamura, K., Latza, C.,  
759 Templer, S.E., Dieterich, C., and Antebi, A. (2016). Mondo complexes regulate TFEB via TOR  
760 inhibition to promote longevity in response to gonadal signals. *Nature communications* 7, 1-15.
- 761 Otarigho, B., and Aballay, A. (2020). Cholesterol regulates innate immunity via nuclear hormone  
762 receptor NHR-8. *iScience*.
- 763 Pereira, L., Kratsios, P., Serrano-Saiz, E., Sheftel, H., Mayo, A.E., Hall, D.H., White, J.G.,  
764 LeBoeuf, B., Garcia, L.R., and Alon, U. (2015). A cellular and regulatory map of the cholinergic  
765 nervous system of *C. elegans*. *Elife* 4, e12432.
- 766 Pinoli, M., Marino, F., and Cosentino, M. (2017). Dopaminergic regulation of innate immunity: a  
767 review. *Journal of Neuroimmune Pharmacology* 12, 602-623.

768 Pocock, R., and Hobert, O. (2010). Hypoxia activates a latent circuit for processing gustatory  
769 information in *C. elegans*. *Nature neuroscience* *13*, 610.

770 Powell, J.R., and Ausubel, F.M. (2008). Models of *Caenorhabditis elegans* infection by bacterial  
771 and fungal pathogens. In *Innate immunity* (Springer), pp. 403-427.

772 Rajan, M., Anderson, C.P., Rindler, P.M., Romney, S.J., dos Santos, M.C.F., Gertz, J., and  
773 Leibold, E.A. (2019). NHR-14 loss of function couples intestinal iron uptake with innate  
774 immunity in *C. elegans* through PQM-1 signaling. In *eLife*, p. e44674.

775 Reddy, K.C., Andersen, E.C., Kruglyak, L., and Kim, D.H. (2009). A polymorphism in *npr-1* is a  
776 behavioral determinant of pathogen susceptibility in *C. elegans*. *Science* *323*, 382-384.

777 Reddy, K.C., Hunter, R.C., Bhatla, N., Newman, D.K., and Kim, D.H. (2011). *Caenorhabditis*  
778 *elegans* NPR-1-mediated behaviors are suppressed in the presence of mucoid bacteria.  
779 *Proceedings of the National Academy of Sciences* *108*, 12887-12892.

780 Rex, E., Hapiak, V., Hobson, R., Smith, K., Xiao, H., and Komuniecki, R. (2005). TYRA-2  
781 (F01E11. 5): a *Caenorhabditis elegans* tyramine receptor expressed in the MC and NSM  
782 pharyngeal neurons. *Journal of neurochemistry* *94*, 181-191.

783 Riera, C.E., and Dillin, A. (2015). Tipping the metabolic scales towards increased longevity in  
784 mammals. *Nature cell biology* *17*, 196-203.

785 Riesen, M., Feyst, I., Rattanavirotkul, N., Ezcurra, M., Tullet, J.M., Papatheodorou, I., Ziehm,  
786 M., Au, C., Gilliat, A.F., and Hellberg, J. (2014). MDL-1, a growth-and tumor-suppressor, slows  
787 aging and prevents germline hyperplasia and hypertrophy in *C. elegans*. *Aging (Albany NY)* *6*,  
788 98.

789 Sellegounder, D., Liu, Y., Wibisono, P., Chen, C.-H., Leap, D., and Sun, J. (2019). Neuronal  
790 GPCR NPR-8 regulates *C. elegans* defense against pathogen infection. *Science Advances* *5*,  
791 eaaw4717.

792 Shapira, M., Hamlin, B.J., Rong, J., Chen, K., Ronen, M., and Tan, M.-W. (2006). A conserved  
793 role for a GATA transcription factor in regulating epithelial innate immune responses.  
794 *Proceedings of the National Academy of Sciences* *103*, 14086-14091.

795 Sifri, C.D., Begun, J., Ausubel, F.M., and Calderwood, S.B. (2003). *Caenorhabditis elegans* as a  
796 model host for *Staphylococcus aureus* pathogenesis. *Infection and immunity* *71*, 2208-2217.

797 Singh, J., and Aballay, A. (2019a). Intestinal infection regulates behavior and learning via  
798 neuroendocrine signaling. *eLife* *8*.

799 Singh, J., and Aballay, A. (2019b). Microbial colonization activates an immune fight-and-flight  
800 response via neuroendocrine signaling. *Developmental cell* *49*, 89-99. e84.

801 Singh, J., and Aballay, A. (2019c). Microbial colonization activates an immune fight-and-flight  
802 response via neuroendocrine signaling. *Developmental cell* *49*, 89-99. e84.

803 Singh, V., and Aballay, A. (2006). Heat-shock transcription factor (HSF)-1 pathway required for  
804 *Caenorhabditis elegans* immunity. *Proceedings of the National Academy of Sciences* *103*,  
805 13092-13097.

806 Singh, V., and Aballay, A. (2009). Regulation of DAF-16-mediated Innate Immunity in  
807 *Caenorhabditis elegans*. *Journal of Biological Chemistry* *284*, 35580-35587.

808 Solana, R., Pawelec, G., and Tarazona, R. (2006). Aging and innate immunity. *Immunity* *24*,  
809 491-494.

810 Styer, K.L., Singh, V., Macosko, E., Steele, S.E., Bargmann, C.I., and Aballay, A. (2008). Innate  
811 immunity in *Caenorhabditis elegans* is regulated by neurons expressing NPR-1/GPCR. *Science*  
812 *322*, 460-464.



813 Sugiura, M., Fuke, S., Suo, S., Sasagawa, N., Van Tol, H.H., and Ishiura, S. (2005).  
814 Characterization of a novel D2-like dopamine receptor with a truncated splice variant and a D1-  
815 like dopamine receptor unique to invertebrates from *Caenorhabditis elegans*. *Journal of*  
816 *neurochemistry* *94*, 1146-1157.

817 Sun, J., Singh, V., Kajino-Sakamoto, R., and Aballay, A. (2011). Neuronal GPCR controls innate  
818 immunity by regulating noncanonical unfolded protein response genes. *Science* *332*, 729-732.

819 Sutphin, G.L., and Kaerberlein, M. (2009). Measuring *Caenorhabditis elegans* life span on solid  
820 media. *JoVE (Journal of Visualized Experiments)*, e1152.

821 Tan, M.-W., Mahajan-Miklos, S., and Ausubel, F.M. (1999). Killing of *Caenorhabditis elegans*  
822 by *Pseudomonas aeruginosa* used to model mammalian bacterial pathogenesis. *Proceedings of*  
823 *the National Academy of Sciences* *96*, 715-720.

824 Templeman, N.M., Luo, S., Kaletsky, R., Shi, C., Ashraf, J., Keyes, W., and Murphy, C.T.  
825 (2018). Insulin signaling regulates oocyte quality maintenance with age via cathepsin B activity.  
826 *Current Biology* *28*, 753-760. e754.

827 Tepper, R.G., Ashraf, J., Kaletsky, R., Kleemann, G., Murphy, C.T., and Bussemaker, H.J.  
828 (2013a). PQM-1 complements DAF-16 as a key transcriptional regulator of DAF-2-mediated  
829 development and longevity. In *Cell*, pp. 676-690.

830 Tepper, R.G., Ashraf, J., Kaletsky, R., Kleemann, G., Murphy, C.T., and Bussemaker, H.J.  
831 (2013b). PQM-1 complements DAF-16 as a key transcriptional regulator of DAF-2-mediated  
832 development and longevity. *Cell* *154*, 676-690.

833 Tepper, R.G., Murphy, C.T., and Bussemaker, H.J. (2014). DAF-16 and PQM-1: partners in  
834 longevity. *Aging (Albany NY)* *6*, 5.

835 Tracey, K.J. (2002). The inflammatory reflex. *Nature* *420*, 853-859.

836 Troemel, E.R., Chu, S.W., Reinke, V., Lee, S.S., Ausubel, F.M., and Kim, D.H. (2006). p38  
837 MAPK regulates expression of immune response genes and contributes to longevity in *C.*  
838 *elegans*. *PLoS genetics* *2*, e183.

839 Tullet, J.M., Hertweck, M., An, J.H., Baker, J., Hwang, J.Y., Liu, S., Oliveira, R.P., Baumeister,  
840 R., and Blackwell, T.K. (2008). Direct inhibition of the longevity-promoting factor SKN-1 by  
841 insulin-like signaling in *C. elegans*. *Cell* *132*, 1025-1038.

842 Walton, T., Preston, E., Nair, G., Zacharias, A.L., Raj, A., and Murray, J.I. (2015). The Bicoid  
843 class homeodomain factors *ceh-36/OTX* and *unc-30/PITX* cooperate in *C. elegans* embryonic  
844 progenitor cells to regulate robust development. *PLoS genetics* *11*.

845 Wani, K.A., Goswamy, D., and Irazoqui, J.E. (2019). A Nutrition-Longevity Tradeoff Enforced  
846 by Innate Immunity. *Molecular cell* *74*, 864-865.

847 Westmoreland, J.J., McEwen, J., Moore, B.A., Jin, Y., and Condie, B.G. (2001). Conserved  
848 Function of *Caenorhabditis elegans* *UNC-30* and Mouse *Pitx2* in Controlling GABAergic Neuron  
849 Differentiation. *Journal of Neuroscience* *21*, 6810-6819.

850 White, J.G., Southgate, E., Thomson, J.N., and Brenner, S. (1986). The structure of the nervous  
851 system of the nematode *Caenorhabditis elegans*. *Philos Trans R Soc Lond B Biol Sci* *314*, 1-340.

852 Wolkow, C.A., Kimura, K.D., Lee, M.-S., and Ruvkun, G. (2000). Regulation of *C. elegans* life-  
853 span by insulinlike signaling in the nervous system. *Science* *290*, 147-150.

854 Wray, C., and Sojka, W. (1978). Experimental *Salmonella typhimurium* infection in calves.  
855 *Research in veterinary science* *25*, 139-143.

856 Wu, Z., Isik, M., Moroz, N., Steinbaugh, M.J., Zhang, P., and Blackwell, T.K. (2019). Dietary  
857 restriction extends lifespan through metabolic regulation of innate immunity. *Cell metabolism*  
858 *29*, 1192-1205. e1198.

859 Yang, W., Dierking, K., and Schulenburg, H. (2016). WormExp: a web-based application for a  
860 *Caenorhabditis elegans*-specific gene expression enrichment analysis. *Bioinformatics* *32*, 943-  
861 945.

862 Yao, L., Wang, J., Li, B., Meng, Y., Ma, X., Si, E., Ren, P., Yang, K., Shang, X., and Wang, H.  
863 (2018). Transcriptome sequencing and comparative analysis of differentially-expressed isoforms  
864 in the roots of *Halogeton glomeratus* under salt stress. *Gene* *646*, 159-168.

865 Yuan, F., Zhou, J., Xu, L., Jia, W., Chun, L., Xu, X.S., and Liu, J. (2019). GABA receptors  
866 differentially regulate life span and health span in *C. elegans* through distinct downstream  
867 mechanisms. *American Journal of Physiology-Cell Physiology* *317*, C953-C963.

868 Zhu, F.-Y., Chen, M.-X., Ye, N.-H., Qiao, W.-M., Gao, B., Law, W.-K., Tian, Y., Zhang, D.,  
869 Zhang, D., and Liu, T.-Y. (2018). Comparative performance of the BGISEQ-500 and Illumina  
870 HiSeq4000 sequencing platforms for transcriptome analysis in plants. *Plant methods* *14*, 69.  
871

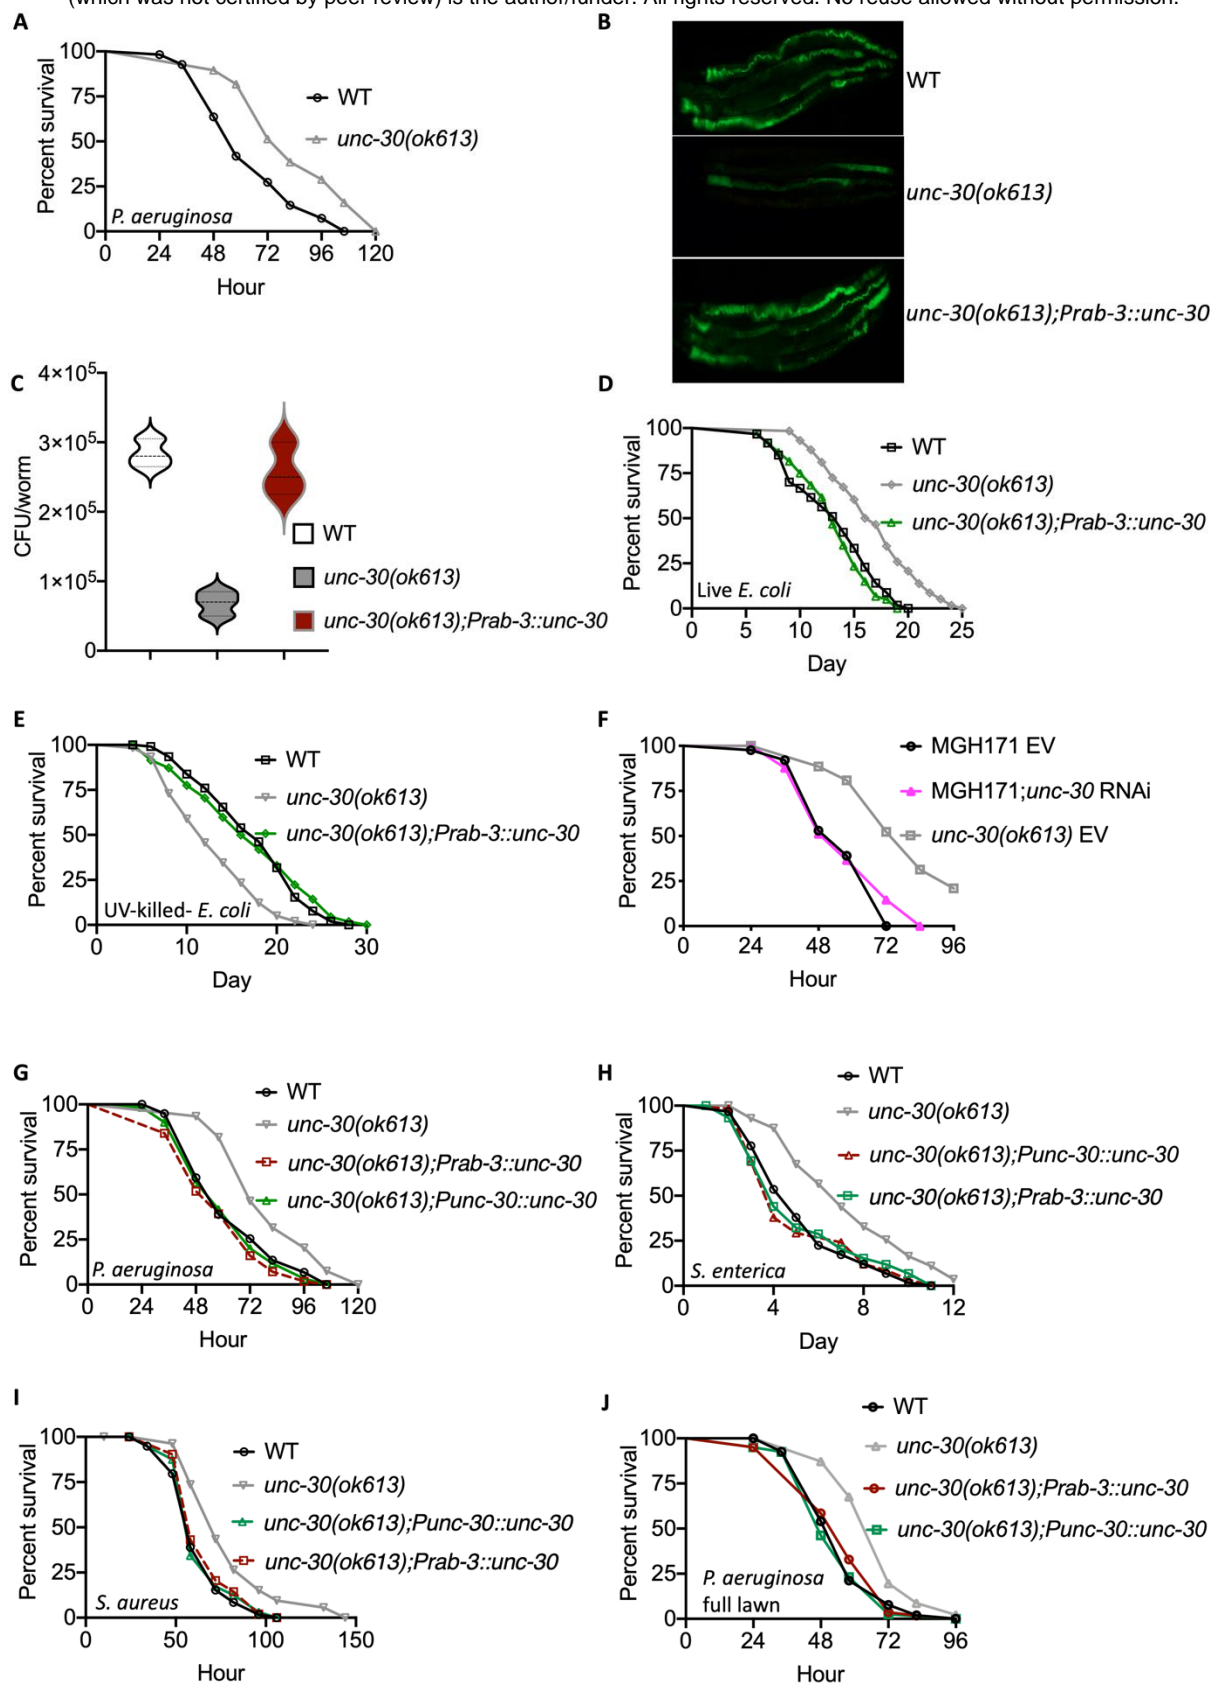

**Figure 1. UNC-30 Functional Loss exhibits enhanced immunity and reduced longevity.**

(A) Wild type (WT) and *unc-30(ok613)* animals were exposed to *P. aeruginosa* partial lawn and scored for survival. WT vs *unc-30(ok613)*,  $P < 0.0001$ .

(B) Colonization of WT, *unc-30(ok613)*, and *unc-30(ok613);Prab-3::unc-30* animals by *P. aeruginosa*-GFP after 24 hours at 25°C.

- (C) Colony-forming units per animal [WT, *unc-30(ok613)*, and *unc-30(ok613);Prab-3::unc-30*] grown on *P. aeruginosa* -GFP for 24 hours at 25°C. Bars represent means while error bars indicate SD; \*\*\*\*p < 0.001.
- (D) WT, *unc-30(ok613)*, and *unc-30(ok613);Prab-3::unc-30* animals were exposed live *E. coli* and scored for survival. WT vs *unc-30(ok613)*, P < 0.0001; *unc-30(ok613);Prab-3::unc-30*, P=NS.
- (E) WT, *unc-30(ok613)*, and *unc-30(ok613);Prab-3::unc-30* animals were exposed UV-killed *E. coli* and scored for survival. WT vs *unc-30(ok613)*, P < 0.0001; *unc-30(ok613);Prab-3::unc-30*, P=NS.
- (F) RNAi intestine-specific strain MGH171, MGH171; *unc-30* RNAi, and *unc-30(ok613)* animals were exposed to *P. aeruginosa* and scored for survival. EV, empty vector RNAi control. MGH171 EV vs. *unc-30(ok613)* EV, P < 0.0001; MGH171;*unc-30* RNAi, P = NS.
- (G) WT, *unc-30(ok613)*, *unc-30(ok613);Punc-30::unc-30*, and *unc-30(ok613);Prab-3::unc-30* animals were exposed to *P. aeruginosa* partial lawn and scored for survival. WT vs *unc-30(ok613)*, P < 0.0001; *unc-30(ok613);Punc-30::unc-30*, and *unc-30(ok613);Prab-3::unc-30*, P = NS.
- (H) WT, *unc-30(ok613)*, *unc-30(ok613);Punc-30::unc-30*, and *unc-30(ok613);Prab-3::unc-30* animals were exposed *S. enterica* partial lawn and scored for survival. WT vs *unc-30(ok613)*, P < 0.0001; *unc-30(ok613);Punc-30::unc-30*, and *unc-30(ok613);Prab-3::unc-30*, P = NS.
- (I) WT, *unc-30(ok613)*, *unc-30(ok613);Punc-30::unc-30*, and *unc-30(ok613);Prab-3::unc-30* animals were exposed *S. aureus* partial lawn and scored for survival. WT vs *unc-30(ok613)*, P < 0.0001; *unc-30(ok613);Punc-30::unc-30*, and *unc-30(ok613);Prab-3::unc-30*, P = NS.
- (J) WT, *unc-30(ok613)*, *unc-30(ok613);Punc-30::unc-30*, and *unc-30(ok613);Prab-3::unc-30* animals were exposed to *P. aeruginosa* full lawn and scored for survival. WT vs *unc-30(ok613)*, P < 0.0001; *unc-30(ok613);Punc-30::unc-30*, and *unc-30(ok613);Prab-3::unc-30*, P = NS.

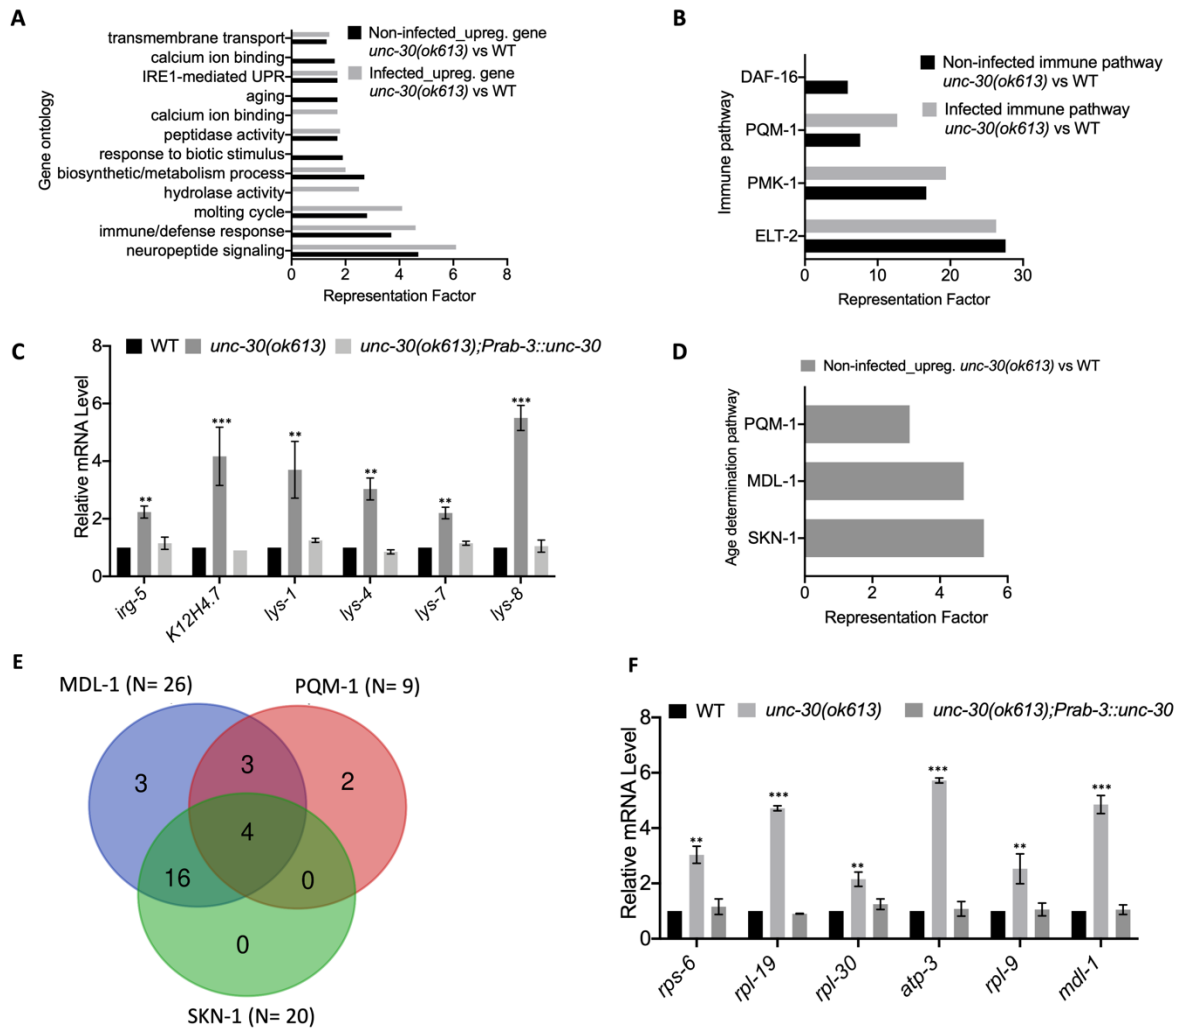

## Figure 2. PITX1/UNC-30 regulates immune and age determination pathways

- (A) Gene ontology analysis of upregulated genes in *unc-30(ok613)* vs WT in both non-infected and *P. aeruginosa*-infected animals. The cutoff is based on the filtering thresholds of  $P < 0.05$  and arranged according to the representation factor.
- (B) Representation factors of immune pathways for the upregulated immune genes in *unc-30(ok613)* vs WT in both non-infected and *P. aeruginosa*-infected animals.
- (C) qRT-PCR analysis of immune gene expression in WT and *unc-30(ok613)* animals. Bars represent means while error bars indicate SD; \* $p < 0.05$ , \*\* $p < 0.001$  and \*\*\* $p < 0.0001$ .
- (D) Representation factors of age determination pathways for the upregulated aging genes in *unc-30(ok613)* vs WT in non-infected animals.
- (E) Venn diagram showing the age determination genes in each pathway for the upregulated aging genes in *unc-30(ok613)* vs WT in non-infected animals.
- (F) qRT-PCR analysis of age determination genes expression in WT and *unc-30(ok613)* animals. Bars represent means while error bars indicate SD; \* $p < 0.05$ , \*\* $p < 0.001$  and \*\*\* $p < 0.0001$ .

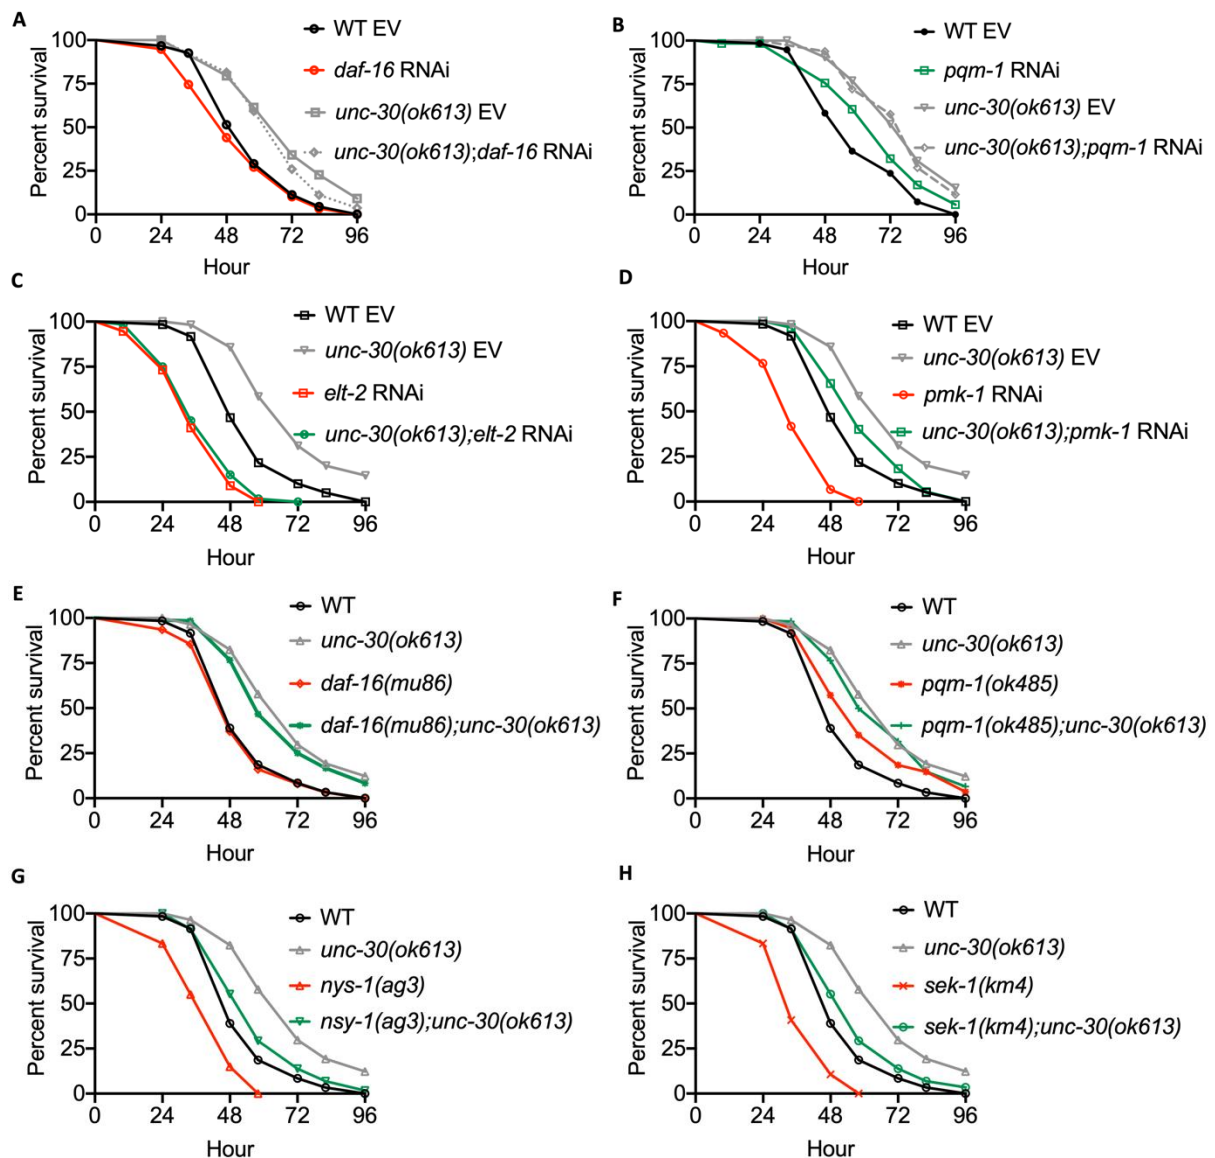

**Figure 3. Functional loss of UNC-30 enhances immunity via the GATA/ELT-2 transcription factor and partly p38 MARK/PMK-1 pathway.**

- (A) WT, *daf-16* RNAi, *unc-30(ok613)*, and *unc-30(ok613);daf-16* RNAi animals were exposed to *P. aeruginosa* and scored for survival. EV, empty vector RNAi control. WT EV vs. *unc-30(ok613)* EV,  $P < 0.0001$ ; *daf-16* RNAi,  $P = \text{NS}$ ; *unc-30(ok613);daf-16* RNAi,  $P < 0.0001$ .
- (B) WT, *pqm-1* RNAi, *unc-30(ok613)*, and *unc-30(ok613);pqm-1* animals were exposed to *P. aeruginosa* and scored for survival. EV, empty vector RNAi control. WT EV vs. *unc-30(ok613)* EV,  $P < 0.0001$ ; *pqm-1* RNAi,  $P < 0.05$ ; *unc-30(ok613);pqm-1* RNAi,  $P < 0.0001$ .
- (C) WT, *elt-2* RNAi, *unc-30(ok613)*, and *unc-30(ok613);elt-2* RNAi animals were exposed to *P. aeruginosa* and scored for survival. EV, empty vector RNAi control. WT EV vs. *unc-30(ok613)* EV,  $P < 0.0001$ ; *elt-2* RNAi,  $P < 0.0001$ ; *unc-30(ok613);elt-2* RNAi,  $P < 0.0001$ . *elt-2* RNAi vs *unc-30(ok613)* *elt-2* RNAi,  $P = \text{NS}$ .
- (D) WT, *pmk-1* RNAi, *unc-30(ok613)*, and *unc-30(ok613);pmk-1* RNAi animals were exposed to *P. aeruginosa* and scored for survival. EV, empty vector RNAi control. WT EV vs. *unc-30(ok613)* EV,  $P < 0.0001$ ; *pmk-1* RNAi,  $P < 0.0001$ ; *unc-*

*30(ok613);pmk-1* RNAi,  $P < 0.05$ . *pmk-1* RNAi vs *unc-30(ok613) pmk-1* RNAi,  $P < 0.0001$ .

- (E) WT, *daf-16(mu86)*, *unc-30(ok613)*, and *daf-16(mu86);unc-30(ok613)* animals were exposed to *P. aeruginosa* and scored for survival. WT vs. *unc-30(ok613)*,  $P < 0.0001$ ; *daf-16(mu86)*,  $P = \text{NS}$ ; *daf-16(mu86);unc-30(ok613)*,  $P < 0.0001$ .
- (F) WT, *pqm-1(ok485)*, *unc-30(ok613)*, and *pqm-1(ok485);unc-30(ok613)* animals were exposed to *P. aeruginosa* and scored for survival. WT vs. *unc-30(ok613)*,  $P < 0.0001$ ; *pqm-1(ok485)*,  $P < 0.05$ ; *pqm-1(ok485);unc-30(ok613)*,  $P < 0.0001$ .
- (G) WT, *nsy-1(ag3)*, *unc-30(ok613)*, and *nsy-1(ag3);unc-30(ok613)* animals were exposed to *P. aeruginosa* and scored for survival. WT vs. *unc-30(ok613)*,  $P < 0.0001$ ; *nsy-1(ag3)*,  $P < 0.0001$ ; *nsy-1(ag3);unc-30(ok613)*,  $P = \text{NS}$ .
- (H) WT, *sek-1(km4)*, *unc-30(ok613)*, and *sek-1(km4);unc-30(ok613)* animals were exposed to *P. aeruginosa* and scored for survival. WT vs. *unc-30(ok613)*,  $P < 0.0001$ ; *sek-1(km4)*,  $P < 0.0001$ ; *sek-1(km4);unc-30(ok613)*,  $P = \text{NS}$ .

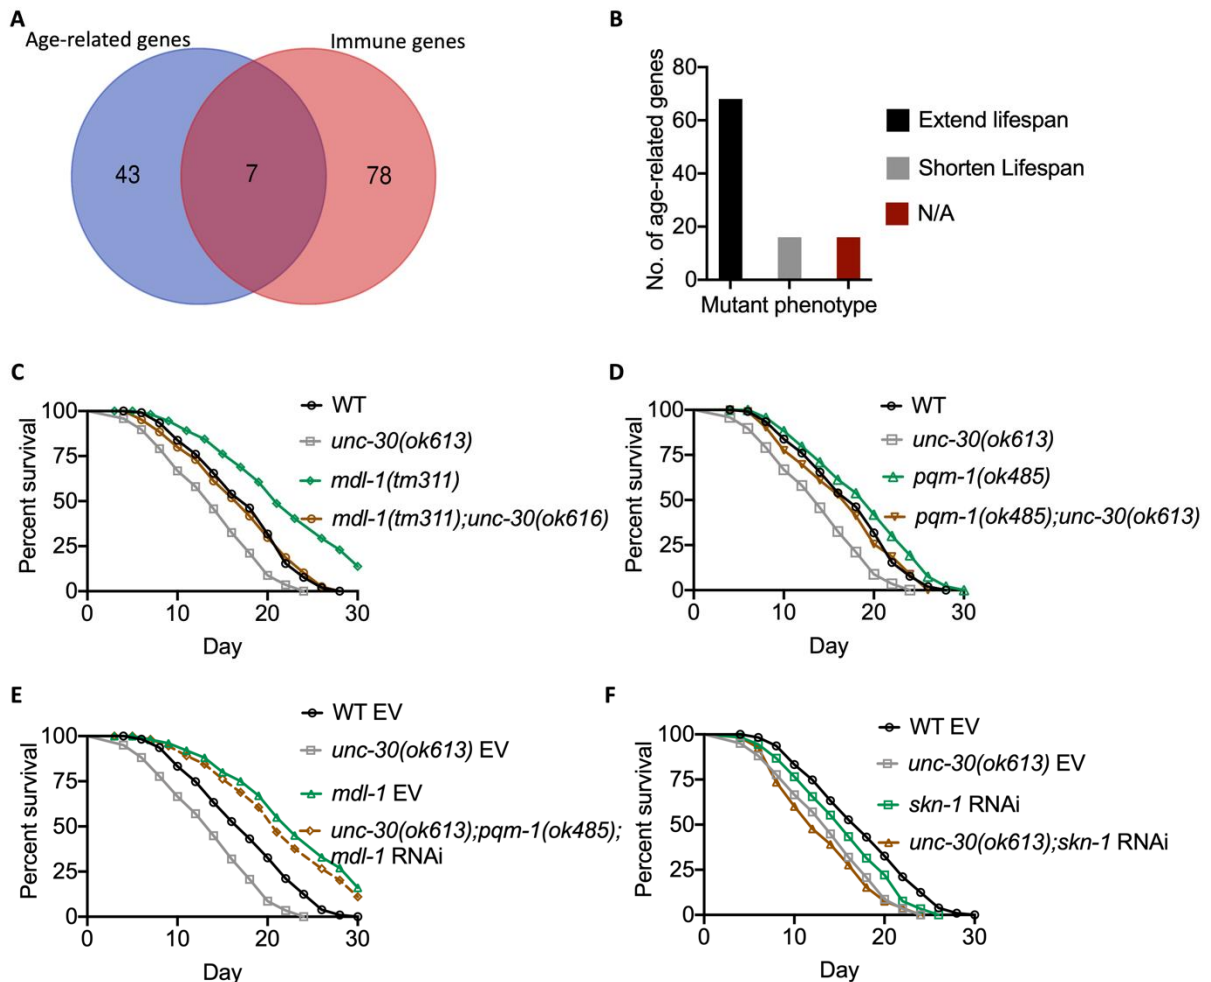

**Figure 4. Functional loss of UNC-30 reduces longevity via MXD3/MDL-1 and PQM-1 pathways**

- (A) Venn diagram of the immune and aging genes upregulated in *unc-30(ok613)* vs WT non-infected animals.
- (B) Number of age determination genes upregulated in *unc-30(ok613)* vs WT for which mutant phenotypes have been reported.
- (C) WT, *mdl-1(tm311)*, *unc-30(ok613)*, and *mdl-1(tm311);unc-30(ok613)* animals were exposed to UV-killed *E. coli* and scored for survival. WT vs. *unc-30(ok613)*,  $P < 0.0001$ ; *mdl-1(tm311)*,  $P < 0.0001$ ; *mdl-1(tm311);unc-30(ok613)*,  $P = \text{NS}$ . *mdl-1(tm311)* vs *mdl-1(tm311);unc-30(ok613)*,  $P < 0.001$ .
- (D) WT, *pqm-1(ok485)*, *unc-30(ok613)*, and *pqm-1(ok485);unc-30(ok613)* animals were exposed to UV-killed *E. coli* and scored for survival. WT vs. *unc-30(ok613)*,  $P < 0.0001$ ; *unc-30(ok613);pqm-1(ok485)*,  $P < 0.0001$ . *unc-30(ok613)* vs *unc-30(ok613);pqm-1(ok485)*,  $P < 0.05$ .
- (E) WT, *unc-30(ok613)*, and *unc-30(ok613);pqm-1(ok485);mdl-1* RNAi animals were exposed to UV-killed *E. coli* and scored for survival. EV, empty vector RNAi control. WT EV vs. *unc-30(ok613)* EV,  $P < 0.0001$ ; *unc-30(ok613);pqm-1(ok485);mdl-1* RNAi,  $P < 0.001$ . *unc-30(ok613);pqm-1(ok485);mdl-1* RNAi vs. *mdl-1* RNAi,  $P = \text{NS}$ .
- (F) WT, *skn-1* RNAi, *unc-30(ok613)*, and *unc-30(ok613);skn-1* RNAi animals were exposed to UV-killed *E. coli* and scored for survival. EV, empty vector RNAi control. WT EV vs *unc-30(ok613)* EV,  $P < 0.0001$ ; *skn-1(mg570)/skn-1* RNAi,  $P < 0.001$ ; *unc-30(ok613);skn-1* RNAi,  $P < 0.0001$ . *skn-1* RNAi vs *unc-30(ok613);skn-1* RNAi,  $P < 0.001$ .



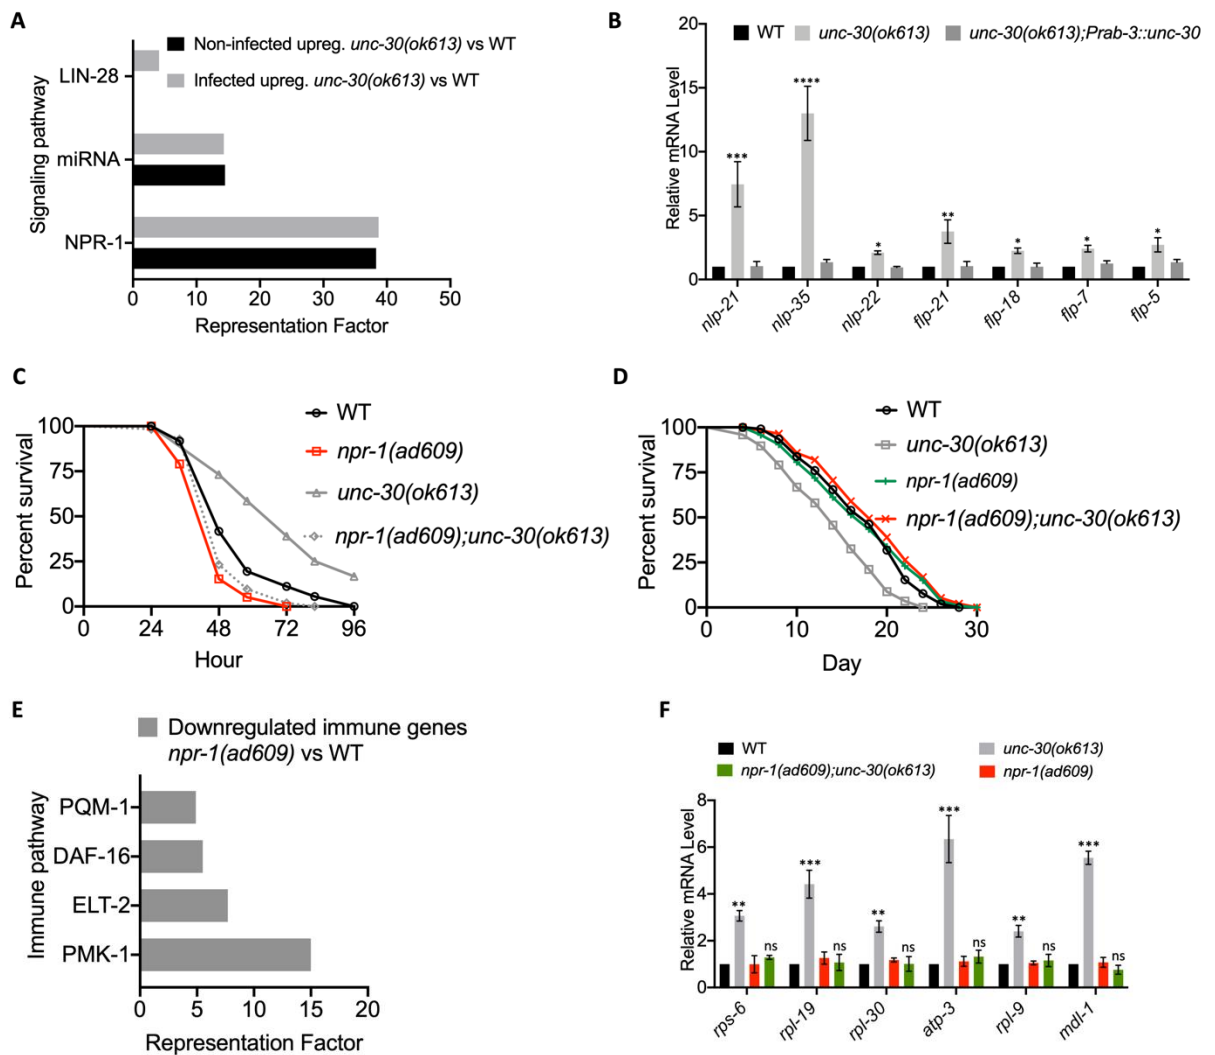

**Figure 5. PITX1/UNC-30 regulates immunity and longevity via neuropeptide signaling.**

- (A) Representation factors of neuropeptide genes upregulated in non-infected and *P. aeruginosa*-infected *unc-30(ok613)* vs WT animals.
- (B) qRT-PCR analysis of neuropeptide gene expression in WT, *unc-30(ok613)* and *unc-30(ok613);Prab-3::unc-30* animals. Bars represent means while error bars indicate SD; \* $p < 0.05$ , \*\* $p < 0.001$  and \*\*\* $p < 0.0001$ .
- (C) WT, *npr-1(ad609)*, *unc-30(ok613)*, and *npr-1(ad609);unc-30(ok613)* animals were exposed to *P. aeruginosa* and scored for survival. WT vs *unc-30(ok613)*,  $P < 0.0001$ ; *npr-1(ad609)*,  $P < 0.001$ ; *npr-1(ad609);unc-30(ok613)*,  $P < 0.05$ . *npr-1(ad609)* vs *npr-1(ad609)::unc-30(ok613)*,  $P = \text{NS}$ .
- (D) WT, *npr-1(ad609)*, *unc-30(ok613)*, and *unc-30(ok613);npr-1(ad609)* animals were exposed to UV-killed *E. coli* and scored for survival. WT vs *unc-30(ok613)*  $P < 0.0001$ ; *npr-1(ad609)*,  $P = \text{NS}$ . While *npr-1(ad609)* vs *unc-30(ok613)*,  $P < 0.0001$ ; *unc-30(ok613);npr-1(ad609)*,  $P = \text{NS}$ .
- (E) Representation factors of immune genes downregulated in *npr-1(ad609)* vs WT.
- (F) qRT-PCR analysis of age determination gene expression in WT, *npr-1(ad609)*, *unc-30(ok613)*, and *unc-30(ok613);npr-1(ad609)* animals. Bars represent means while error bars indicate SD; \* $p < 0.05$ , \*\* $p < 0.001$  and \*\*\* $p < 0.0001$ .

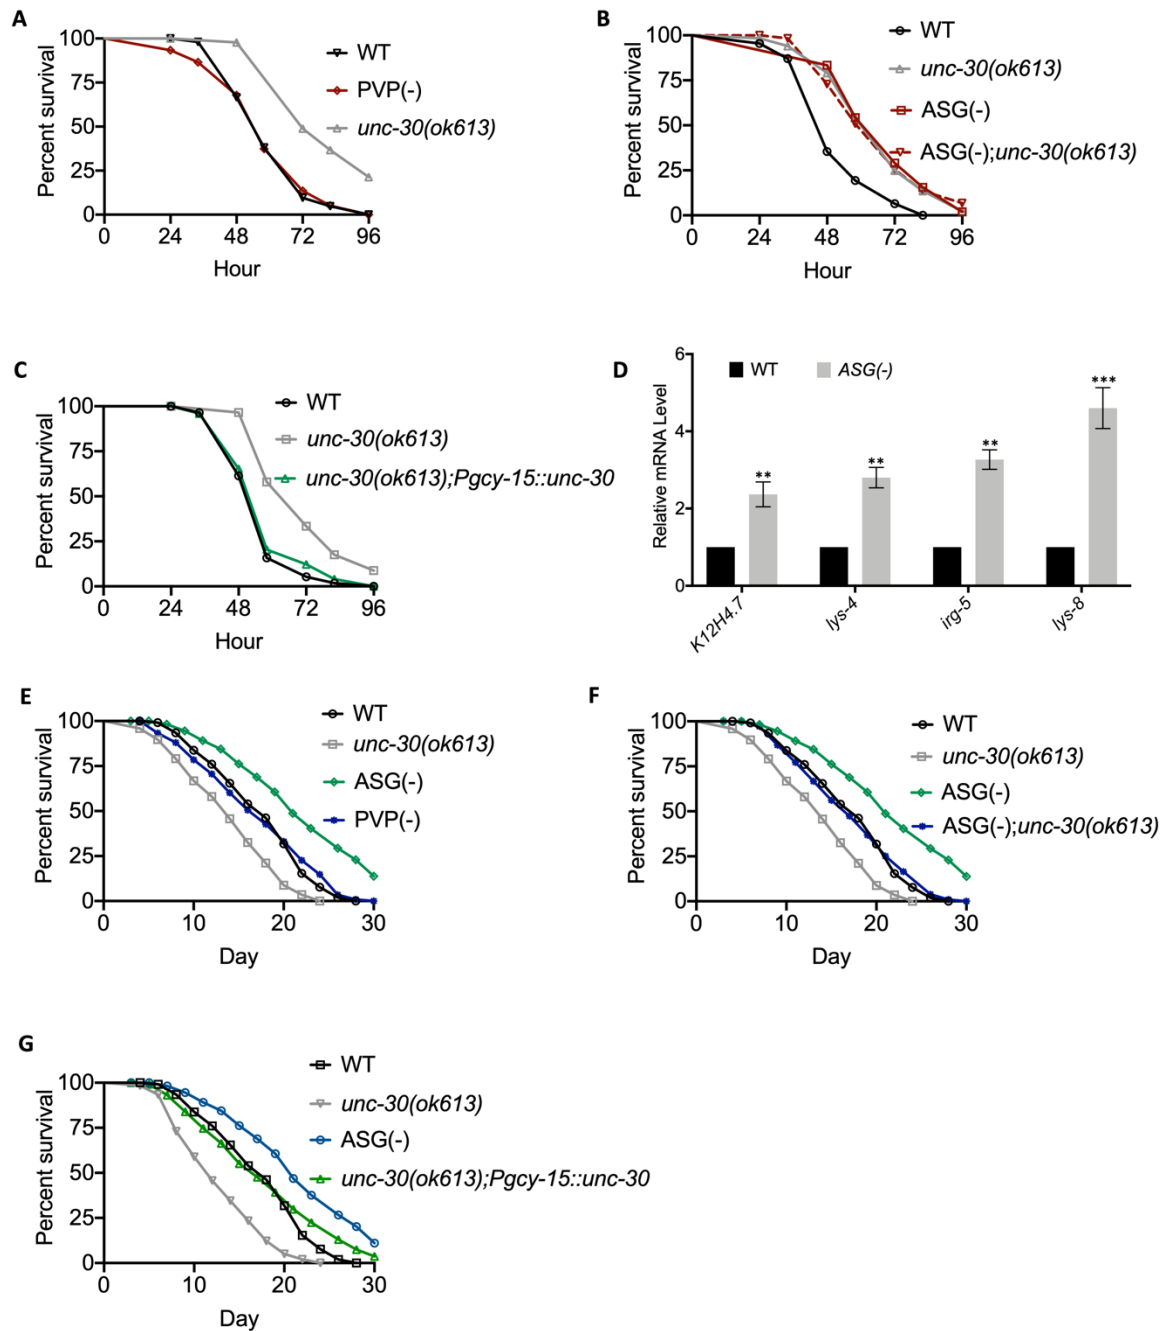

**Figure 6. ASG neurons control the immunity-longevity tradeoff**

- (A) WT, PVP (-), and *unc-30(ok613)* animals were exposed to *P. aeruginosa* and scored for survival. WT vs PVP (-), P = NS.
- (B) WT, *unc-30(ok613)*, ASG(-), and ASG(-);*unc-30(ok613)* animals were exposed to *P. aeruginosa* and scored for survival. WT vs ASG(-), P < 0.0001; ASG(-);*unc-30(ok613)*, P < 0.0001. While ASG(-) vs. ASG(-);*unc-30(ok613)*, P = NS.
- (C) qRT-PCR analysis of immune gene expression in WT and ASG(-) animals. Bars represent means while error bars indicate SD; \*\*p < 0.001 and \*\*\*p < 0.0001.
- (D) WT, *unc-30(ok613)*, *unc-30(ok613);Pgcy-15::unc-30* animals were exposed to *P. aeruginosa* and scored for survival. WT vs *unc-30(ok613);Pgcy-15::unc-30*, P = NS.
- (E) WT, ASG(-), PVP(-), and *unc-30(ok613)* animals were exposed to UV-killed *E. coli* and scored for survival. WT vs ASG(-), P < 0.0001; *unc-30(ok613)*, P < 0.0001.

- (F) WT, ASG(-), ASG(-);*unc-30(ok613)*, and *unc-30(ok613)* animals were exposed to UV-killed *E. coli* and scored for survival. WT vs ASG(-),  $P < 0.0001$ ; *unc-30(ok613)*,  $P < 0.0001$ . *unc-30(ok613)* vs ASG(-);*unc-30(ok613)*,  $P < 0.001$ .
- (G) WT, *unc-30(ok613)*, *unc-30(ok613);Pgyc-15::unc-30* animals were exposed to UV-killed *E. coli* and scored for survival. WT vs *unc-30(ok613);Pgyc-15::unc-30*,  $P = \text{NS}$ .

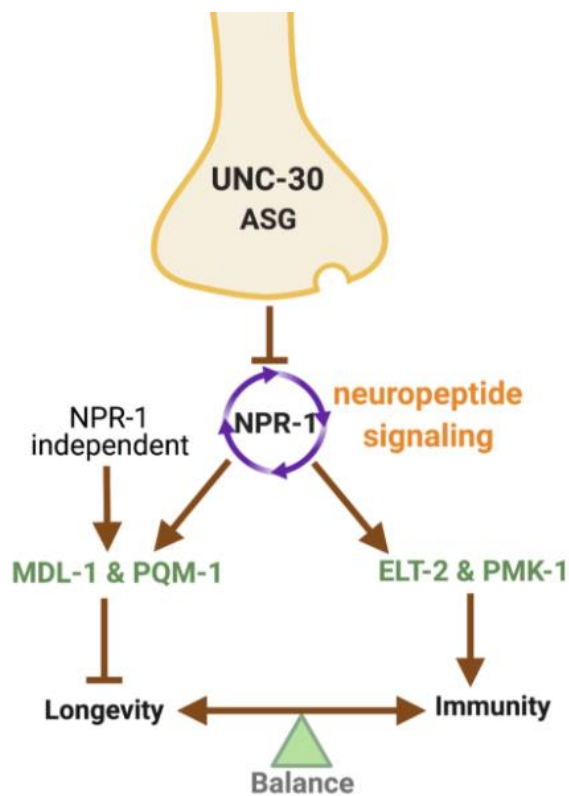

**Figure 7. Model for neuronal control of the tradeoff between immunity and longevity via neuropeptide signaling in *C. elegans*.** Neuronal PITX1/UNC-30, via the NPR-1, inhibits immunity by preventing the expression of ELT-2- and PMK-1-dependent immune genes and promotes longevity by preventing the expression of MDL-1 and PQM-1-dependent age-related genes.
